# Supplementary material for: USP7 inhibits Wnt/β-catenin signaling through promoting stabilization of Axin
Source: Nat Commun. 2019 Sep 13;10:4184. doi: 10.1038/s41467-019-12143-3 (PMC6744515; doi:10.1038/s41467-019-12143-3)
Supplement: Supplementary file 2 — Supplementary dataset [file 41467_2019_12143_MOESM2_ESM.xlsx]

## Sheet: Sheet1
symbol	Z-score	RSA_Up	P Value
ZNRF3	15.0153	-14.3715	4.25065e-15
CSNK1A1	13.1635	-11.8009	1.58167e-12
NF2	11.5555	-11.2943	5.07828e-12
AXIN1	9.92685	-8.62557	2.36824e-09
AMOT	7.39469	-7.76341	1.72421e-08
DCAF7	6.08817	-7.7346	1.84247e-08
PEX26	6.14808	-7.66917	2.14203e-08
PRODH	6.58052	-7.23884	5.76982e-08
RBPJ	6.15661	-7.14583	7.14772e-08
SF1	12.195	-7.06727	8.56496e-08
SMARCB1	4.29205	-7.00822	9.81248e-08
CNOT8	3.33228	-6.9606	1.09496e-07
ENO1	7.12299	-6.93217	1.16905e-07
ZNF777	3.62736	-6.88502	1.30311e-07
SAV1	3.23883	-6.86097	1.37732e-07
HSPA13	4.18485	-6.73808	1.82775e-07
PHIP	3.24713	-6.71347	1.93434e-07
UBE4B	3.04781	-6.71081	1.94622e-07
CLTCL1	3.72954	-6.65675	2.2042e-07
SUZ12	5.3432	-6.40635	3.92329e-07
OXLD1	4.08877	-6.33635	4.60941e-07
EIF4ENIF1	4.40837	-6.33412	4.6332e-07
PIAS1	3.72675	-6.15125	7.05905e-07
SEC14L2	3.38562	-6.08173	8.28448e-07
CTAGE9	5.50569	-6.00227	9.94793e-07
DENR	3.14018	-5.99327	1.01563e-06
BCL11A	4.00835	-5.95278	1.11485e-06
AKAP8L	2.94686	-5.88852	1.29265e-06
CCDC116	2.6104	-5.8867	1.29807e-06
SOX10	6.23003	-5.79794	1.59243e-06
ING3	3.58043	-5.73064	1.85934e-06
AIFM3	5.28382	-5.71378	1.93295e-06
SMCHD1	2.84867	-5.66334	2.17101e-06
DNAJA2	13.904	-5.63042	2.34196e-06
CRYBB3	2.94281	-5.62852	2.35225e-06
DDT	3.82116	-5.60449	2.48606e-06
MVB12A	4.88463	-5.59965	2.5139e-06
EIF1	4.2777	-5.58943	2.57379e-06
APC	3.88786	-5.58017	2.62924e-06
CAPZB	3.20393	-5.5718	2.68042e-06
SLC4A9	1.98053	-5.50643	3.11583e-06
RERE	4.29444	-5.50581	3.12024e-06
BRE	3.57002	-5.48755	3.25427e-06
USP7	4.43253	-5.45515	3.50629e-06
SLC25A39	2.88034	-5.42144	3.78935e-06
TBKBP1	4.2402	-5.4106	3.88505e-06
TNPO1	2.67053	-5.38188	4.15065e-06
DGCR6	3.14747	-5.27587	5.29823e-06
KAT2A	3.2305	-5.19585	6.37017e-06
UPB1	3.44475	-5.18556	6.52293e-06
TSC2	4.62636	-5.14029	7.23948e-06
ERVV-1	2.27049	-5.13816	7.27507e-06
CECR1	2.66381	-5.11256	7.71693e-06
TMEM161A	2.25664	-5.10798	7.7987e-06
UQCR10	8.41461	-5.09211	8.08889e-06
FAM60A	4.08858	-5.07242	8.46417e-06
NUPL1	6.06029	-5.04666	8.98124e-06
JOSD1	2.26231	-5.01864	9.57981e-06
ESPL1	10.2489	-5.0042	9.9037e-06
MFNG	5.04543	-4.9617	1.09219e-05
AXIN2	2.11788	-4.9486	1.12565e-05
PCBP2	2.72363	-4.94341	1.13917e-05
LAMTOR2	3.48159	-4.93009	1.17465e-05
ZNRD1	4.99618	-4.93004	1.17479e-05
FSCN2	4.38502	-4.92792	1.18053e-05
UBE2D3	3.27154	-4.90692	1.23901e-05
PHF6	4.3778	-4.88486	1.30358e-05
IFI30	6.35364	-4.8764	1.32924e-05
SLC25A19	3.71517	-4.87369	1.33755e-05
MRPL22	4.41486	-4.81001	1.54879e-05
SLC26A11	5.85483	-4.79953	1.5866e-05
C7orf55-LUC7L2	2.78095	-4.73882	1.82463e-05
COX6B1	3.80256	-4.72941	1.8646e-05
ASNA1	8.00529	-4.72552	1.88141e-05
PITPNB	1.77089	-4.72005	1.90526e-05
ENTHD2	4.09463	-4.71813	1.91366e-05
BAHD1	3.93671	-4.71516	1.92679e-05
CEP131	3.41549	-4.69995	1.99547e-05
CNTD2	4.20887	-4.69189	2.03287e-05
NPTXR	4.59675	-4.67434	2.1167e-05
AP2S1	4.35906	-4.67338	2.12138e-05
FNIP1	2.7817	-4.6597	2.18927e-05
NPLOC4	4.13601	-4.65427	2.21681e-05
JSRP1	4.34412	-4.63046	2.34175e-05
SUPT20H	3.38968	-4.6207	2.39495e-05
TRPS1	3.67647	-4.61998	2.39897e-05
EMID1	2.65054	-4.58955	2.57305e-05
IRF2BP1	4.32766	-4.5759	2.65523e-05
SLC25A1	4.09186	-4.559	2.76055e-05
VPS41	2.14514	-4.51386	3.06298e-05
EWSR1	1.96878	-4.50383	3.13451e-05
FAM167B	7.13869	-4.49949	3.16597e-05
CRKL	2.50769	-4.49251	3.21727e-05
IWS1	2.7832	-4.49175	3.22294e-05
AGO2	6.10784	-4.48049	3.30757e-05
DDA1	2.47749	-4.46419	3.43409e-05
ENDOV	3.11808	-4.46136	3.45654e-05
FAM110B	5.22871	-4.46066	3.46214e-05
VAC14	3.8602	-4.45985	3.46857e-05
PLVAP	5.04487	-4.45082	3.54143e-05
TM6SF2	4.53105	-4.4057	3.92913e-05
CDK5	1.79809	-4.40403	3.94431e-05
SLC25A18	2.719	-4.39249	4.05054e-05
SENP8	2.44187	-4.3752	4.21505e-05
APOL6	2.47379	-4.362	4.34505e-05
HSPB9	1.88956	-4.35301	4.43594e-05
EXOC7	3.83352	-4.34962	4.47072e-05
HSCB	9.11831	-4.34444	4.52441e-05
SLC25A17	2.25714	-4.34299	4.53952e-05
RNF2	2.6316	-4.33337	4.64124e-05
UBR5	2.65165	-4.32839	4.69469e-05
ACO2	4.41528	-4.32308	4.7525e-05
RPS16	9.04833	-4.3177	4.81172e-05
CRB3	2.41629	-4.29879	5.02584e-05
SDF2L1	2.34871	-4.28797	5.15266e-05
SYN3	2.35618	-4.27558	5.30178e-05
LRRC45	3.05478	-4.27194	5.34635e-05
TJAP1	3.07144	-4.27095	5.35855e-05
GATSL3	2.1156	-4.26993	5.37115e-05
DDTL	2.35095	-4.26207	5.4693e-05
PUM1	3.22408	-4.25719	5.53107e-05
GSTT2B	1.45081	-4.24794	5.65015e-05
VGLL4	3.79001	-4.24671	5.66614e-05
PAQR8	2.57339	-4.24217	5.72578e-05
CHMP2A	4.50618	-4.23763	5.78588e-05
ELAVL1	1.92459	-4.23499	5.82122e-05
TRAF2	3.57793	-4.22752	5.92214e-05
COX7B	2.86384	-4.22431	5.96615e-05
TMEM235	4.27253	-4.21997	6.026e-05
ELOF1	5.26095	-4.21919	6.03686e-05
FOXC1	2.58172	-4.21609	6.08003e-05
CTBP2	4.99757	-4.21607	6.08044e-05
GGT5	2.97048	-4.20478	6.24054e-05
PNRC1	4.30727	-4.20133	6.29024e-05
APOL1	1.77746	-4.19308	6.41094e-05
MRPL40	3.47423	-4.18602	6.51599e-05
C17orf89	2.06863	-4.17896	6.62284e-05
PSMD4	3.31462	-4.1778	6.64054e-05
IMPACT	5.31687	-4.16936	6.77087e-05
ACER1	3.10908	-4.16358	6.86156e-05
PCGF1	4.12269	-4.16186	6.88877e-05
CDC37	8.40339	-4.16155	6.8937e-05
OCEL1	1.76427	-4.15442	7.00779e-05
KDELR3	2.54892	-4.15401	7.01447e-05
SCPEP1	2.58871	-4.15344	7.02366e-05
SDHAF1	3.6204	-4.14878	7.09939e-05
PRR14L	2.6263	-4.14136	7.22173e-05
C15orf27	6.79327	-4.1411	7.22607e-05
NOP16	8.27911	-4.12919	7.42687e-05
SECTM1	3.83363	-4.11001	7.76231e-05
NBN	2.93877	-4.09977	7.94747e-05
EXOSC7	7.63862	-4.09346	8.06384e-05
RPS19BP1	3.49316	-4.08818	8.1624e-05
TECR	2.50481	-4.08766	8.17215e-05
MCMBP	2.94444	-4.08434	8.23499e-05
PTPN23	3.13395	-4.07389	8.43543e-05
VPS18	4.39361	-4.06612	8.58775e-05
HIST1H4C	1.44826	-4.05833	8.74324e-05
PCGF5	1.64993	-4.05082	8.89568e-05
HIST2H4B	1.54845	-4.04567	9.00171e-05
HIST2H4A	1.54845	-4.04567	9.00171e-05
SUN2	5.78981	-4.03973	9.12587e-05
GJC2	4.59473	-4.03635	9.19708e-05
SPC25	3.95987	-4.01915	9.56873e-05
ATN1	4.01574	-4.01063	9.75827e-05
TRMT112	2.09628	-4.00739	9.83131e-05
URI1	7.89594	-4.00456	9.89558e-05
HAP1	4.05669	-4.00123	9.97183e-05
MED26	5.07973	-4.00057	9.98697e-05
MICAL3	1.44284	-3.98789	0.000102828
VPS39	4.70702	-3.98787	0.000102832
SLBP	2.78257	-3.98536	0.000103428
FAM98C	4.87024	-3.98031	0.000104639
NRN1	2.82034	-3.9668	0.000107945
LARGE	2.16322	-3.96001	0.000109645
HCST	1.46855	-3.95896	0.00010991
FAM104B	7.73263	-3.95703	0.000110401
CTAGE4	2.59035	-3.95348	0.000111307
CHMP3	2.07647	-3.95015	0.000112163
VPS33A	5.32408	-3.94952	0.000112325
EMC1	5.67193	-3.94451	0.00011363
RSPH4A	1.96058	-3.94375	0.000113828
NCOA6	7.69258	-3.94269	0.000114106
ATXN7L3	3.48814	-3.93567	0.000115966
GP1BB	4.64693	-3.93216	0.000116908
RGL4	3.77176	-3.92822	0.000117971
PRTG	1.81186	-3.90472	0.000124531
PPP2R3C	1.74693	-3.89977	0.00012596
MED13	3.94316	-3.85383	0.000140015
OSBPL7	2.89727	-3.85331	0.000140181
PITPNC1	2.50177	-3.85099	0.000140931
YME1L1	2.7099	-3.82871	0.000148351
PCDHA13	3.44966	-3.82445	0.000149813
DNAJB13	7.34445	-3.81601	0.000152752
ASCC2	2.98067	-3.81005	0.000154866
YDJC	1.65929	-3.80767	0.000155714
BRD7	2.04401	-3.79695	0.000159606
HIST1H3H	1.3345	-3.79182	0.000161504
MIPEP	4.80603	-3.79061	0.000161954
L3MBTL2	2.46373	-3.79011	0.000162139
PGS1	3.60861	-3.78311	0.000164774
YPEL1	2.5283	-3.78022	0.000165876
PIWIL3	7.26477	-3.77761	0.000166874
GADD45B	2.81732	-3.77038	0.000169676
MBOAT2	7.24576	-3.76827	0.000170501
CCT3	7.21184	-3.75903	0.000174167
KRTDAP	3.40386	-3.75525	0.000175693
DUS1L	1.20826	-3.75078	0.000177511
CCDC74B	2.75423	-3.74652	0.000179258
MPHOSPH8	2.17297	-3.71343	0.000193449
NCF4	2.20398	-3.70994	0.000195013
EZH2	2.72452	-3.7071	0.00019629
UVSSA	2.48766	-3.70121	0.000198972
FRG2B	2.28775	-3.68902	0.000204636
SMG8	3.7673	-3.67565	0.000211031
CDR2L	3.73411	-3.67552	0.000211094
GNPTG	1.42688	-3.67331	0.000212173
RASSF2	2.61235	-3.67275	0.000212449
UBA5	3.88459	-3.67043	0.000213583
COA3	1.84072	-3.6588	0.000219384
PTBP1	1.85073	-3.65502	0.0002213
TAOK1	2.15209	-3.65307	0.000222296
ERLEC1	1.08908	-3.65247	0.000222603
ZBTB24	1.66038	-3.65216	0.000222762
ADD2	3.5662	-3.65141	0.000223149
KRT15	2.76047	-3.64317	0.000227423
SLC25A10	1.70005	-3.63675	0.000230807
KRI1	6.77488	-3.63316	0.000232723
ZDHHC8	3.86666	-3.63207	0.00023331
IZUMO4	2.86829	-3.62479	0.000237255
CELF5	1.71909	-3.61889	0.000240497
ENY2	4.04062	-3.61857	0.000240672
DPF2	2.55914	-3.61748	0.000241277
BIRC2	1.45041	-3.60524	0.000248175
DET1	2.31365	-3.59471	0.000254265
PCDHA12	2.01138	-3.58531	0.000259828
MIS12	3.31768	-3.58418	0.000260509
DDX5	2.49789	-3.58273	0.000261381
HORMAD2	2.48694	-3.58172	0.000261988
SYNGR1	2.41216	-3.57971	0.000263204
BRCC3	3.41701	-3.57661	0.000265089
DNAJC7	1.58963	-3.57644	0.00026519
MAGEA8	6.55573	-3.57188	0.000267989
GTF2H5	2.63222	-3.57093	0.000268579
USHBP1	3.24254	-3.55974	0.000275585
CALR3	1.09908	-3.55957	0.000275697
PTPRZ1	1.13288	-3.54839	0.000282885
RBM12	2.34515	-3.54814	0.000283046
CANT1	2.66555	-3.54625	0.000284279
TACC2	2.86964	-3.5345	0.000292079
CECR6	2.61499	-3.53237	0.000293514
CNOT2	2.16811	-3.53136	0.000294196
ORAOV1	1.63799	-3.52756	0.000296786
SEC14L3	3.24613	-3.52621	0.000297709
MRI1	3.4021	-3.52558	0.00029814
TSC1	2.48743	-3.52523	0.000298382
SUGP2	3.97677	-3.51854	0.000303009
APOL3	2.56072	-3.51082	0.000308449
ZMYM2	3.24239	-3.49785	0.000317798
NDUFAF4	1.23106	-3.4942	0.000320481
TSTA3	1.5744	-3.49335	0.000321106
RALGAPA2	3.07676	-3.48609	0.000326521
CAP1	2.94373	-3.48602	0.000326576
MBD3	4.90912	-3.4856	0.000326887
DARS2	3.3384	-3.4764	0.00033389
HAS3	6.32267	-3.47416	0.000335617
DCUN1D3	1.22462	-3.47328	0.000336298
CCDC124	3.24962	-3.47324	0.000336326
PPP1R15A	4.47636	-3.47299	0.00033652
C19orf24	2.71674	-3.47283	0.000336645
MCHR1	2.49928	-3.46647	0.000341612
DAXX	2.94125	-3.4642	0.000343399
HAPLN4	1.79064	-3.46313	0.000344248
PET117	1.72267	-3.46027	0.00034652
PNPLA1	3.15069	-3.45702	0.000349125
DBF4B	3.11075	-3.45629	0.000349714
NUDCD2	6.25632	-3.45298	0.00035239
KANSL1	1.20939	-3.45066	0.000354275
VTA1	1.87171	-3.44676	0.000357468
DMKN	1.81455	-3.44656	0.000357634
UST	1.67229	-3.44581	0.000358254
MTF2	2.36728	-3.44121	0.000362071
CCDC157	3.63284	-3.43533	0.000367001
EXOC3L2	6.20715	-3.43388	0.000368232
GLTSCR1	4.48676	-3.42769	0.000373518
NIPSNAP1	3.72466	-3.42229	0.000378186
ANKS1A	2.66018	-3.42079	0.000379501
RD3	6.1655	-3.41983	0.000380339
MAMSTR	2.91637	-3.41653	0.000383239
DRG1	1.64329	-3.41204	0.000387218
MAMDC4	1.15572	-3.41146	0.000387737
FAM127C	0.696883	-3.40946	0.000389529
RNF103-CHMP3	2.60057	-3.40921	0.000389758
SLC30A1	6.12898	-3.40753	0.000391263
FBF1	3.01969	-3.40664	0.000392068
SERINC1	2.17726	-3.40605	0.000392602
SLC38A10	1.39621	-3.40195	0.000396327
CHORDC1	5.67002	-3.40093	0.000397256
ATP5L2	2.73349	-3.40014	0.000397976
CHSY3	6.09085	-3.3924	0.000405133
ARID3C	4.12444	-3.39201	0.000405498
ARG1	1.3126	-3.39051	0.000406899
ACTG1	3.37815	-3.38898	0.000408337
43713	2.47832	-3.38718	0.000410038
SSR2	3.07119	-3.38703	0.000410174
MRPS11	2.02233	-3.38645	0.000410727
GPR143	3.96967	-3.37725	0.000419515
BID	2.25531	-3.37685	0.000419905
SPPL3	2.34768	-3.36804	0.000428511
SMIM3	1.49683	-3.36748	0.000429058
NDUFA3	3.55584	-3.36452	0.000431994
TACO1	2.41887	-3.36179	0.000434718
SERTAD2	3.07689	-3.36086	0.000435656
REEP6	2.77503	-3.36077	0.000435743
MFSD12	5.37795	-3.35793	0.0004386
PRRC2A	2.98827	-3.35412	0.000442466
HPS4	3.53485	-3.35059	0.000446073
ATP5SL	2.80548	-3.35045	0.000446216
CUEDC1	2.33226	-3.34808	0.000448661
INTS12	2.19055	-3.34774	0.000449018
SIPA1L2	3.80714	-3.34624	0.000450566
PROL1	1.7163	-3.34515	0.000451703
DDAH2	3.20754	-3.34428	0.000452606
SOX11	1.42418	-3.33715	0.000460095
PQLC1	3.24617	-3.33692	0.000460341
EARS2	5.90391	-3.33583	0.0004615
BABAM1	4.86817	-3.3349	0.000462483
TET3	3.12657	-3.33452	0.000462897
SF3B5	2.38866	-3.33427	0.000463154
FGFR1OP	5.88312	-3.33163	0.000465986
TMEM200A	2.11321	-3.33154	0.000466079
CARS2	2.96656	-3.32693	0.000471056
TIMP3	1.83044	-3.32047	0.000478112
NKAIN4	2.03446	-3.31886	0.000479885
RPE	2.14123	-3.31681	0.000482163
SERTAD1	1.43294	-3.3159	0.000483167
GINM1	2.01191	-3.30768	0.000492399
ARID3A	3.08119	-3.30452	0.000495998
ABHD17A	1.38796	-3.30292	0.000497829
HYPK	2.66229	-3.30267	0.00049812
PCYT2	3.29255	-3.29998	0.00050121
HDGFRP3	1.35132	-3.29883	0.000502539
RNASEH2B	2.83369	-3.29773	0.000503818
RPS15	3.05258	-3.29733	0.000504273
IMP3	5.78741	-3.29606	0.000505759
SRP68	2.18339	-3.29244	0.000509993
UPF3B	1.61246	-3.28957	0.000513364
FAM49B	3.21991	-3.28626	0.000517297
LIN54	4.63002	-3.28194	0.000522463
KLF2	1.22359	-3.28014	0.000524639
PYCR1	2.81236	-3.27949	0.000525428
MROH6	2.37629	-3.27948	0.000525433
TAF10	2.73147	-3.27165	0.000534996
MRPL17	1.79914	-3.27129	0.000535439
EDC4	2.23731	-3.26947	0.000537689
MEF2B	1.90952	-3.26711	0.000540617
MEF2BNB-MEF2B	1.90952	-3.26711	0.000540617
DTD1	3.56843	-3.26416	0.000544297
COX5B	3.54734	-3.26215	0.000546827
MRPL41	2.30074	-3.26168	0.00054742
TMEM101	2.24293	-3.25879	0.000551074
MRPL28	1.66949	-3.25459	0.000556433
PLEC	2.82968	-3.25381	0.000557434
C6orf89	2.00538	-3.25249	0.00055913
USP48	3.2257	-3.25105	0.000560983
HS6ST2	1.83518	-3.24549	0.000568208
KRT38	1.88286	-3.24399	0.000570182
FTSJ2	3.43215	-3.24388	0.000570319
NMT1	1.61404	-3.24033	0.000575005
SOX4	5.62292	-3.24029	0.000575057
PLSCR5	2.99664	-3.23832	0.000577672
ZNF99	1.25602	-3.23582	0.000581007
BECN1	5.60816	-3.23155	0.000586752
COX16	3.76489	-3.2297	0.000589248
PPM1G	1.73792	-3.22734	0.000592465
GDE1	5.59777	-3.22659	0.000593487
DERL3	2.37306	-3.21755	0.000605964
C22orf15	3.36521	-3.20877	0.000618347
FAM20A	2.13609	-3.2064	0.000621721
LMNB2	3.25888	-3.20239	0.000627495
KLF16	1.90428	-3.20039	0.000630391
RTN2	2.83827	-3.19756	0.000634514
MORN3	5.50989	-3.19744	0.000634691
BRD2	2.31563	-3.19659	0.000635925
IGFLR1	3.92829	-3.19649	0.000636079
TRAPPC3L	2.38769	-3.19501	0.000638242
ZNF282	1.91559	-3.19317	0.000640953
FUT1	3.23418	-3.19303	0.000641159
CDC42EP1	1.41279	-3.19249	0.000641963
FXYD3	2.31525	-3.19207	0.000642585
PHOSPHO1	1.0121	-3.18556	0.000652287
HIST1H2AE	1.67018	-3.18546	0.000652444
BZRAP1	1.68605	-3.1847	0.000653583
CDS2	2.77607	-3.18128	0.000658754
APOBEC3D	1.13326	-3.18085	0.000659402
MLF2	2.01247	-3.18043	0.000660037
SBSPON	2.67976	-3.18005	0.000660621
ZG16	3.09508	-3.17542	0.00066769
GTF3C1	4.14509	-3.17441	0.00066925
TMEM211	3.03047	-3.17236	0.00067242
ZNF185	2.75911	-3.1669	0.00068092
CTNNA1	2.20617	-3.16563	0.000682914
APOBEC3H	1.89467	-3.16362	0.000686096
PRPF31	5.42806	-3.16005	0.000691745
KIAA1614	4.93145	-3.15809	0.000694883
HIRA	2.52867	-3.15734	0.000696079
CCNG1	1.63102	-3.15352	0.000702236
GTF2H3	2.97858	-3.15001	0.000707935
SF3A2	3.41622	-3.149	0.000709578
UBE2D2	1.56792	-3.14579	0.00071485
SMTN	2.79241	-3.14298	0.000719486
EFTUD2	5.34028	-3.14067	0.000723315
SYF2	5.37763	-3.13527	0.000732368
SCAMP4	2.30068	-3.12873	0.00074348
UBE2Q1	3.00741	-3.12508	0.000749751
HIST1H3B	2.40976	-3.12473	0.000750355
DISP2	1.66063	-3.12418	0.000751313
KRT5	5.34484	-3.12314	0.000753106
COMT	1.42128	-3.1199	0.000758745
CTNNBIP1	3.14189	-3.11942	0.000759594
DENND6A	5.34296	-3.11878	0.000760718
LAMTOR3	3.89143	-3.11754	0.00076289
NFYA	3.07431	-3.11604	0.00076552
BCL2L13	1.86918	-3.11483	0.00076767
NKAPL	2.7884	-3.11427	0.000768648
VCP	4.23739	-3.11049	0.000775374
LOXL4	-0.318594	-3.1085	0.000778937
FSTL3	3.19385	-3.10777	0.00078025
FAM163A	2.55148	-3.10349	0.000787966
CD22	1.52107	-3.09986	0.00079458
GATAD2B	1.97404	-3.09966	0.000794949
KIAA0907	3.02868	-3.09871	0.000796684
MAFF	3.00837	-3.0971	0.000799642
PRCD	2.98086	-3.09644	0.000800867
TSPAN16	2.20973	-3.09634	0.000801053
GGA1	1.65313	-3.09543	0.000802724
SFI1	2.2588	-3.09443	0.000804584
NIPAL3	4.23028	-3.09421	0.000804984
STX10	2.66632	-3.09373	0.000805888
AP1B1	2.00949	-3.09302	0.000807194
IRF2BP2	3.60315	-3.09131	0.000810391
SSU72	5.27721	-3.08567	0.000820983
FAM195B	1.92644	-3.0827	0.000826606
RUNDC1	2.83507	-3.082	0.000827939
LATS1	1.84565	-3.07871	0.000834245
MCEMP1	1.81746	-3.07801	0.000835587
TMCC2	2.35392	-3.07767	0.000836239
ENTHD1	2.89532	-3.07447	0.00084242
FAM217B	2.05791	-3.07163	0.000847942
MEX3D	1.40446	-3.06776	0.000855542
PLIN4	1.86055	-3.0633	0.000864379
MEIS2	1.37047	-3.06112	0.000868726
GGN	1.50342	-3.06042	0.000870113
ZNF492	1.7528	-3.05838	0.000874212
MED8	5.17855	-3.05581	0.000879399
NPB	2.54736	-3.05535	0.000880338
ACOX1	1.96306	-3.05243	0.000886288
TMEM258	0.217094	-3.05052	0.000890175
MB	1.62607	-3.04917	0.000892947
SYCE2	2.1074	-3.04803	0.000895302
JAK3	1.29909	-3.04681	0.000897815
CCDC101	3.55692	-3.04636	0.000898748
RARS2	4.02125	-3.04544	0.000900667
APOL5	3.68463	-3.0421	0.000907614
NELFA	2.78799	-3.03837	0.000915432
LIMK2	1.43166	-3.03651	0.000919361
PCDHA4	2.38221	-3.03601	0.000920433
SLC30A9	3.03501	-3.03426	0.000924136
CSH2	1.9881	-3.03065	0.000931858
MED24	2.54669	-3.02948	0.000934374
TINAGL1	-0.952154	-3.02421	0.000945789
MCAT	3.23436	-3.02129	0.000952152
TUBGCP2	5.09677	-3.01919	0.000956785
SSBP4	3.44438	-3.01676	0.000962139
KRT6B	5.09099	-3.01435	0.000967488
XKR8	3.73008	-3.01375	0.000968834
OOEP	1.78579	-3.01267	0.000971248
DICER1	2.19698	-3.00484	0.000988908
MICALL1	1.89776	-3.00185	0.000995754
ESCO2	3.17305	-2.99999	0.00100002
P2RX2	1.9291	-2.99938	0.00100143
CD320	1.96817	-2.99923	0.00100178
PET100	2.43011	-2.99417	0.00101353
CLPSL1	2.31494	-2.99307	0.00101608
WDR83	2.20812	-2.98847	0.0010269
LY6E	2.7287	-2.98832	0.00102726
GHDC	3.42655	-2.98756	0.00102906
TBC1D7	2.161	-2.98694	0.00103052
C17orf70	2.85447	-2.98618	0.00103234
FAM229B	2.02578	-2.98344	0.00103886
SUPT7L	2.44988	-2.98205	0.00104219
UQCRQ	1.08693	-2.98106	0.00104458
HIST1H1A	1.4928	-2.97782	0.00105241
CCDC71L	2.64522	-2.97627	0.00105616
NUMBL	2.18858	-2.97592	0.00105701
TMC4	2.93614	-2.97582	0.00105726
ANKRD11	1.76763	-2.97399	0.00106172
MTMR3	1.17549	-2.97344	0.00106307
DCTN5	4.98807	-2.97298	0.00106419
EIF2B3	1.70592	-2.96822	0.00107593
TNNT1	1.51555	-2.96755	0.00107757
XRCC2	4.97121	-2.96749	0.00107772
MAP3K3	1.85217	-2.9667	0.00107969
HIST1H2BD	1.47951	-2.96594	0.00108158
TSC22D3	3.27954	-2.96187	0.00109176
TP53	1.75164	-2.95919	0.00109854
MED18	2.90289	-2.95845	0.00110039
ECSIT	4.95339	-2.95842	0.00110046
PTOV1	1.75724	-2.95813	0.0011012
CIZ1	2.13017	-2.95513	0.00110884
RBM14-RBM4	2.65933	-2.95365	0.00111262
STX7	2.91524	-2.949	0.00112461
TRAF3	2.07244	-2.94858	0.00112569
UQCRB	2.58771	-2.94794	0.00112734
MXRA7	1.92568	-2.94764	0.00112812
EVI5L	1.49095	-2.94398	0.00113767
UNC13D	1.72351	-2.94361	0.00113866
FAM83E	4.73322	-2.9433	0.00113946
KIAA0195	2.5168	-2.94248	0.00114161
RPL27	4.39874	-2.94075	0.00114619
KRTAP3-3	4.90737	-2.9388	0.00115132
ANKRD52	1.64917	-2.93687	0.00115647
XRN2	-0.374504	-2.93247	0.00116822
CCDC109B	4.89895	-2.93091	0.00117245
MTFP1	2.3548	-2.93043	0.00117374
CDH2	1.90499	-2.92938	0.00117658
ISOC2	2.71602	-2.92735	0.00118208
ADGRG6	2.37292	-2.92336	0.00119301
CEP95	3.72315	-2.91594	0.00121356
CEP89	3.91348	-2.91548	0.00121483
NARS	4.84991	-2.91361	0.00122007
NANOS3	2.66498	-2.91215	0.00122418
LSM10	3.31482	-2.91044	0.00122903
DNAL4	3.23537	-2.90827	0.00123518
GFM1	2.49937	-2.90773	0.00123672
NDUFS5	1.43864	-2.90035	0.00125791
PRR7	1.65146	-2.89778	0.00126538
CATSPERG	1.51926	-2.89475	0.00127424
DGCR2	1.98952	-2.8946	0.00127467
TMEM182	-0.206414	-2.89298	0.00127943
RPLP0	2.32728	-2.89272	0.0012802
TFAP2C	0.729946	-2.89127	0.00128449
ABCA7	0.984111	-2.88834	0.00129318
LYPD5	1.38147	-2.87878	0.00132198
EDF1	1.41101	-2.8774	0.00132617
EIF1B	3.52935	-2.87235	0.00134168
MLX	0.802875	-2.87186	0.00134319
CTBP1	4.01883	-2.87181	0.00134334
NGDN	3.82029	-2.87155	0.00134417
TMEM104	2.3051	-2.86964	0.00135009
KLHDC8B	2.60738	-2.8694	0.00135082
MAGEA1	4.72143	-2.85893	0.00138379
SHC1	0.915998	-2.85604	0.00139302
DTNBP1	3.24913	-2.85477	0.00139711
SYNGR2	4.71314	-2.85413	0.00139917
USE1	2.49826	-2.85377	0.00140033
EXOC5	1.61149	-2.85092	0.00140956
CEP290	2.42941	-2.85081	0.00140991
HELZ	1.76087	-2.8494	0.00141448
TRIOBP	1.27486	-2.84634	0.00142449
AKAP7	2.11095	-2.84253	0.00143705
RPL35A	1.52831	-2.83977	0.00144621
NARS2	4.66108	-2.8391	0.00144843
FADS6	2.47063	-2.83748	0.00145384
CSNK1G2	2.47539	-2.83509	0.00146186
FAM193A	2.4569	-2.83498	0.00146223
ZNF70	1.26269	-2.834	0.00146554
LRRC46	1.06295	-2.83142	0.00147428
RILPL1	3.56128	-2.82997	0.0014792
TFAP4	1.50495	-2.82937	0.00148125
43525	1.53962	-2.82928	0.00148155
COX19	1.6095	-2.8265	0.00149107
GOLGA6L1	1.2822	-2.82339	0.0015018
CRYBA4	3.25117	-2.82304	0.001503
SHISA7	1.44882	-2.82298	0.00150322
HNRNPA1	2.94317	-2.82241	0.0015052
MN1	1.53895	-2.81958	0.00151501
FDX1L	2.11924	-2.81952	0.00151523
RBBP4	2.97235	-2.80913	0.00155194
PDS5B	0.888263	-2.80883	0.00155299
MBD3L2	1.4834	-2.80795	0.00155614
GDF1	3.29635	-2.8076	0.00155739
TICRR	2.88024	-2.80679	0.0015603
SRP9	4.58491	-2.80605	0.00156297
SUPT5H	4.58211	-2.8053	0.00156568
CLTC	1.68257	-2.80474	0.00156768
ZC3H3	3.75987	-2.8016	0.00157907
COPB2	2.77245	-2.80119	0.00158056
XRN1	3.57508	-2.79641	0.00159805
CECR5	1.51551	-2.79513	0.00160277
CSHL1	1.60191	-2.79285	0.00161119
CHURC1	0.199241	-2.79237	0.00161297
PRAME	2.90901	-2.79193	0.00161461
TROAP	3.6419	-2.79152	0.00161613
NOV	3.09698	-2.79057	0.00161967
PCGF3	1.6827	-2.78971	0.0016229
LRRC75B	4.54508	-2.78963	0.00162321
XPO5	2.481	-2.788	0.0016293
CD3EAP	2.73194	-2.78586	0.00163734
43717	1.94515	-2.78421	0.00164357
UBP1	2.16915	-2.78378	0.00164522
TEAD3	3.37174	-2.78087	0.00165626
SLC52A3	2.20137	-2.78057	0.00165742
EIF5A	2.98002	-2.77888	0.00166387
EIF3L	4.46831	-2.77838	0.00166578
DOCK6	2.99454	-2.77714	0.00167055
B4GALNT2	2.15645	-2.77707	0.00167083
RFNG	2.16365	-2.77492	0.00167912
HIVEP1	2.80011	-2.77293	0.00168683
KCMF1	2.43566	-2.77248	0.00168857
MRPS6	4.51269	-2.77206	0.00169019
TMC8	3.14744	-2.77036	0.00169685
CRYBB1	2.74415	-2.76915	0.00170157
MGAT3	4.3539	-2.76888	0.00170261
TMEM100	1.45288	-2.7685	0.00170412
RGP1	4.00455	-2.76833	0.0017048
C19orf70	2.55901	-2.76405	0.00172166
FH	3.35497	-2.76135	0.00173239
C9orf41	2.39981	-2.76037	0.0017363
SEC14L1	1.03042	-2.75754	0.00174766
TMEM59L	1.60176	-2.75662	0.00175139
RRAGC	1.03501	-2.75582	0.0017546
NFKBIB	1.67013	-2.75548	0.00175599
TSPAN7	2.46721	-2.75489	0.00175836
PHF23	1.79693	-2.75402	0.00176191
SRSF6	2.38192	-2.75196	0.00177029
ZBTB2	1.11592	-2.75161	0.00177169
GSTT2	1.45081	-2.75145	0.00177237
METTL16	2.6509	-2.75092	0.00177453
ZNHIT2	3.47564	-2.74965	0.00177972
LRP3	2.35421	-2.74893	0.00178266
RASIP1	3.43322	-2.74801	0.00178646
ROMO1	2.19258	-2.74613	0.00179421
MTERF4	2.37364	-2.74553	0.00179669
RHBDF2	2.25795	-2.74497	0.00179899
IMMT	2.13436	-2.74458	0.00180063
ZFAND5	4.46422	-2.74428	0.00180185
CEP295NL	2.26206	-2.74286	0.00180774
PRMT7	1.82018	-2.74048	0.00181768
ABHD8	1.54454	-2.73792	0.00182842
FAM217A	2.89649	-2.73709	0.00183195
CPSF1	0.80904	-2.7363	0.00183529
AADAC	2.59043	-2.73541	0.00183905
MCOLN1	1.12616	-2.7346	0.00184247
ISYNA1	4.44218	-2.73453	0.00184277
ATXN1	2.78942	-2.73349	0.00184719
CRYBB2	2.15771	-2.73302	0.0018492
SMIM6	1.53443	-2.73262	0.00185088
GTPBP10	2.48624	-2.73229	0.00185229
UFD1L	2.33963	-2.73181	0.00185433
MED12	4.43836	-2.73107	0.0018575
MKS1	2.87607	-2.72729	0.00187375
MYCT1	1.58829	-2.72466	0.00188513
ATP5H	0.88306	-2.72407	0.00188771
WISP2	0.611061	-2.72334	0.00189086
ERO1LB	4.41988	-2.72283	0.00189307
ALDOA	1.61612	-2.72271	0.00189362
YEATS4	2.49421	-2.72228	0.00189548
KIAA1211	4.41778	-2.72215	0.00189605
FBXW9	1.96588	-2.71941	0.00190805
FAM175A	3.2255	-2.71882	0.00191065
DDX41	3.61848	-2.71849	0.00191211
FOXRED2	2.99788	-2.71696	0.00191885
IL27RA	0.894531	-2.71637	0.00192146
LMBR1	3.50674	-2.71609	0.00192271
FTSJ3	3.69493	-2.71583	0.00192385
RASSF7	2.11688	-2.71535	0.00192595
B3GNTL1	1.72963	-2.71259	0.00193824
CCT7	3.4144	-2.71211	0.00194037
NACA	2.27427	-2.71188	0.00194142
RBFOX2	1.58091	-2.71139	0.00194361
TCN2	2.01439	-2.71089	0.00194587
ABCC1	1.61256	-2.70975	0.00195096
NDUFB4	2.56738	-2.70811	0.00195836
AFMID	2.39017	-2.70765	0.00196042
RPS20	4.39285	-2.70592	0.00196823
PDE6G	1.20472	-2.70433	0.00197549
OLFM2	2.21423	-2.70396	0.00197717
NKIRAS2	1.41063	-2.70231	0.00198467
TTYH2	1.063	-2.70214	0.00198544
CTNS	2.65974	-2.7004	0.00199342
ZNF397	1.37769	-2.69988	0.00199582
MRPL14	4.14071	-2.69854	0.002002
ATP5J2-PTCD1	1.78258	-2.69524	0.00201727
PTCD1	1.78258	-2.69524	0.00201727
SMIM7	2.02226	-2.69421	0.00202202
ONECUT3	0.715904	-2.68926	0.00204521
APTX	0.75302	-2.68665	0.00205757
SPTBN1	1.61119	-2.68551	0.00206294
TIMM44	2.42643	-2.68511	0.00206487
NAA20	2.18228	-2.68402	0.00207004
CHMP5	2.97673	-2.68396	0.00207035
RIMBP3	2.81315	-2.67958	0.0020913
ATG5	2.24804	-2.67936	0.00209236
MRPS23	2.81266	-2.6773	0.00210231
NOL12	2.04057	-2.67705	0.00210353
KCNC3	1.59084	-2.67621	0.00210762
STMND1	1.4921	-2.67513	0.00211285
SUN5	1.10664	-2.67507	0.00211313
FERMT2	0.907642	-2.67356	0.00212052
FAM184A	2.1985	-2.67352	0.00212073
LUC7L2	1.79987	-2.67339	0.00212134
DGCR6L	1.9269	-2.67213	0.00212751
ADAM11	1.85475	-2.672	0.00212813
GH1	0.867928	-2.67141	0.00213105
AVEN	3.01133	-2.66848	0.00214548
USP31	1.701	-2.66835	0.00214611
WBP2	1.72828	-2.66686	0.00215347
PKM	1.67789	-2.66678	0.00215388
KRT36	1.06394	-2.66612	0.00215716
RAB11B	1.49699	-2.66538	0.00216085
NDUFA1	1.78647	-2.66488	0.00216331
RPS8	1.35881	-2.6638	0.00216869
TNPO2	2.80731	-2.66233	0.00217607
NPW	1.72298	-2.66207	0.00217734
SCARA5	1.58923	-2.66084	0.00218351
YIPF5	1.75734	-2.6607	0.00218425
AP2M1	2.52518	-2.65665	0.0022047
TSSK2	1.32626	-2.65545	0.00221081
C6orf136	2.4705	-2.65532	0.00221145
TMC6	2.63387	-2.65284	0.00222413
HIST1H4K	1.95497	-2.65164	0.00223026
HIST1H4J	1.95497	-2.65164	0.00223026
ARC	2.07617	-2.6496	0.0022408
WNK4	1.27777	-2.6482	0.00224799
TRIM15	1.42908	-2.64428	0.0022684
ORC6	1.39304	-2.6421	0.0022798
ZNF750	2.27124	-2.64153	0.00228279
DYNLL1	2.96081	-2.64129	0.00228409
CYTH4	1.59841	-2.63979	0.00229196
NPAT	4.25662	-2.63839	0.00229938
GARS	1.62527	-2.63816	0.00230058
SRRD	2.46138	-2.63658	0.00230898
ACBD3	4.2492	-2.6353	0.00231577
ADAT2	3.21638	-2.63376	0.00232402
CDK8	1.97889	-2.6332	0.00232702
SORCS1	4.24328	-2.63162	0.00233551
IL20RA	1.39483	-2.63036	0.0023423
NTN5	1.54446	-2.62995	0.00234451
CD7	0.817401	-2.62671	0.00236207
LYL1	1.84181	-2.6259	0.00236646
TMEM69	1.34672	-2.62436	0.00237488
TOPBP1	1.71535	-2.62144	0.00239091
PRAMEF10	1.58582	-2.6204	0.00239664
COA5	3.4936	-2.6177	0.00241158
YIPF2	3.15434	-2.61617	0.00242006
TNRC6B	1.44301	-2.61588	0.00242172
KPTN	3.46983	-2.61574	0.00242249
AZI2	4.20464	-2.61522	0.00242536
FMNL1	2.62851	-2.61467	0.00242846
USF1	2.09118	-2.61225	0.00244202
NUTF2	2.01292	-2.61146	0.00244645
ARL17B	2.13441	-2.61064	0.00245108
ARL17A	2.13441	-2.61064	0.00245108
KIAA1143	2.67647	-2.61053	0.00245172
UBR1	2.62098	-2.60896	0.00246058
CABP7	1.45278	-2.60895	0.00246063
PNPLA2	0.989355	-2.60863	0.00246245
GFY	2.59142	-2.60646	0.00247478
MPV17	1.4889	-2.60438	0.00248669
ADTRP	3.26644	-2.60233	0.00249846
USP10	2.82931	-2.59546	0.00253827
RSPH6A	2.86313	-2.59439	0.00254452
GALR2	1.55059	-2.59079	0.00256574
AK2	1.19107	-2.58983	0.0025714
AP1M1	3.00091	-2.58885	0.00257721
PRPF38A	4.12705	-2.58048	0.00262738
SARS2	1.60099	-2.58025	0.00262877
HRC	4.12612	-2.5799	0.00263087
PRKCB	0.979005	-2.57934	0.00263427
CNP	2.34367	-2.5793	0.00263454
SGCD	2.27921	-2.57763	0.00264468
MIOX	0.897633	-2.57696	0.00264873
DHDH	2.43616	-2.57384	0.00266785
ATP6V0B	3.03549	-2.57371	0.00266862
TUBGCP5	4.11905	-2.57358	0.00266943
TMCO4	2.23627	-2.573	0.002673
GAPVD1	1.40233	-2.57229	0.00267738
TMEM190	3.29421	-2.57132	0.00268337
RAD9A	4.1075	-2.56788	0.00270471
EAPP	3.49797	-2.56713	0.00270936
ISL2	1.86313	-2.56708	0.00270967
DCTN1	4.10566	-2.56674	0.0027118
TIMELESS	4.10395	-2.56618	0.00271534
BRIP1	2.66063	-2.56463	0.00272503
MAFA	4.10331	-2.56448	0.00272599
FAM96A	4.09939	-2.56278	0.00273666
OSBP	1.26234	-2.56248	0.00273852
AAGAB	2.53526	-2.55963	0.00275655
PISD	4.09589	-2.55883	0.00276163
TRMT61A	2.67463	-2.55714	0.0027724
TADA3	4.09121	-2.55603	0.00277954
MRPL54	1.14584	-2.556	0.00277969
CLDN5	1.33902	-2.55543	0.00278334
GRIK5	1.37788	-2.55286	0.00279986
ACTN4	1.1075	-2.54762	0.00283385
CEACAM3	0.975719	-2.54747	0.00283487
ATP5G1	0.872225	-2.54591	0.00284508
YJEFN3	1.32401	-2.54468	0.0028531
ITFG3	1.46766	-2.54364	0.00285999
T	0.903647	-2.54255	0.00286714
CAPZA3	1.48842	-2.54224	0.0028692
AMH	1.90083	-2.54166	0.00287304
SMARCD2	1.81661	-2.54123	0.0028759
MAK	0.711291	-2.54099	0.00287745
LINGO3	1.19709	-2.53998	0.00288416
TSEN34	4.07099	-2.53993	0.00288448
TNFAIP8L3	1.80211	-2.53945	0.00288768
WBSCR22	0.662427	-2.53899	0.00289075
ARVCF	1.41623	-2.53725	0.00290237
ISX	1.30959	-2.53574	0.00291246
E2F3	2.11915	-2.53435	0.00292179
NBR1	1.64139	-2.53337	0.00292838
ACBD4	2.01041	-2.53042	0.00294835
CARD10	3.47739	-2.52989	0.00295196
IL12RB1	1.54015	-2.52818	0.00296362
CYP4F2	0.920012	-2.52586	0.0029795
FAM175B	2.0931	-2.52555	0.00298163
PLA2G6	2.09978	-2.52307	0.00299866
DENND1C	2.02297	-2.52075	0.00301471
KRT13	3.0242	-2.52052	0.00301631
SRP19	4.02741	-2.52037	0.00301737
EZH1	1.40297	-2.51898	0.00302703
GPHN	4.02279	-2.51876	0.00302857
GPR137C	2.10211	-2.51799	0.00303393
BEST2	2.16367	-2.51732	0.00303868
NDUFA13	2.40531	-2.51699	0.00304095
FLCN	2.84401	-2.51606	0.0030475
SEC14L4	2.29401	-2.5156	0.00305071
TSEN15	1.94383	-2.51297	0.00306923
GTF3C5	2.81715	-2.51139	0.00308042
TAS2R5	0.690695	-2.51098	0.00308334
CYP4F11	1.08521	-2.50837	0.00310193
MED15	2.00004	-2.50727	0.00310977
SEC61A2	0.231389	-2.50684	0.00311284
EXOSC8	2.34993	-2.50482	0.00312735
SPRY2	2.66991	-2.49917	0.00316835
CENPJ	1.66747	-2.49917	0.00316835
RIPPLY1	2.16681	-2.49809	0.00317618
FRMD1	2.8475	-2.4977	0.00317907
SOGA3	3.29931	-2.49661	0.00318704
GRN	1.07124	-2.49635	0.00318893
PUS7	2.54349	-2.49612	0.00319064
PRKACA	1.18454	-2.49529	0.00319678
LHFPL5	1.60865	-2.49311	0.00321283
GOLGA6B	0.826091	-2.49277	0.00321535
MIDN	1.52615	-2.49255	0.003217
C2orf69	3.03472	-2.49003	0.00323571
SERPIND1	1.46112	-2.48957	0.00323911
GTF2A2	3.36107	-2.48866	0.00324595
BHLHE23	1.53874	-2.48782	0.00325222
LRRC25	1.33135	-2.48699	0.00325845
GALK1	2.20273	-2.48585	0.00326701
CRYL1	2.3598	-2.48569	0.00326824
RCC1	-0.0347567	-2.48421	0.00327938
UFSP2	2.12598	-2.48299	0.00328856
MOB3A	2.51526	-2.48255	0.00329195
INSL3	1.34946	-2.48062	0.00330661
GUCD1	3.16541	-2.47698	0.00333439
TNFAIP2	2.82366	-2.47697	0.00333452
RHBDD3	3.35312	-2.47691	0.00333497
ANKRD6	1.20375	-2.47606	0.00334147
TMEM199	3.93012	-2.47592	0.00334253
CEP162	2.40195	-2.47361	0.0033604
CLDN3	3.6968	-2.47327	0.00336299
CACNA1A	1.25264	-2.47185	0.00337407
FLT3LG	1.23756	-2.47049	0.0033846
NFIC	1.61876	-2.47005	0.00338807
AP1M2	1.60546	-2.46849	0.00340022
APOL2	1.89849	-2.46661	0.00341503
CBX6	1.76136	-2.46379	0.00343726
SMC2	1.06011	-2.4627	0.0034459
CFDP1	2.8057	-2.46193	0.00345196
DENND4A	3.90245	-2.46078	0.00346111
TMEM14B	1.83951	-2.46033	0.00346471
CCDC151	3.04814	-2.45926	0.00347331
CHCHD10	2.96016	-2.45811	0.00348249
SIN3B	3.69666	-2.45792	0.00348402
ADAMTSL5	1.95185	-2.45471	0.00350985
PHACTR3	0.585182	-2.45464	0.00351046
SMEK2	1.49542	-2.45247	0.00352804
EFS	1.26159	-2.45236	0.0035289
ARID2	1.52434	-2.45038	0.003545
ZNF763	0.797307	-2.44985	0.00354935
CD37	2.03118	-2.44978	0.00354996
SNRPC	2.3789	-2.44841	0.00356112
PPA2	1.73121	-2.44813	0.00356341
DSCC1	2.44284	-2.44634	0.00357813
SLC35E1	2.13084	-2.44595	0.00358135
DBP	1.83834	-2.44589	0.00358189
GOLT1B	2.38115	-2.44501	0.00358914
THOC2	2.32117	-2.44312	0.00360477
SMPDL3A	1.38572	-2.44292	0.00360648
SIPA1L3	2.27326	-2.44135	0.00361949
HSF5	1.17476	-2.4402	0.00362907
TMEM206	3.46693	-2.43767	0.00365034
PYY	2.70036	-2.43712	0.00365497
HLA-C	1.42423	-2.43704	0.00365559
SHCBP1L	2.21006	-2.43598	0.00366455
PDGFB	1.82691	-2.43443	0.00367762
KIAA0355	2.23354	-2.43411	0.00368039
UPK3BL	2.52957	-2.43224	0.00369627
ZNF609	1.48548	-2.42966	0.00371828
HES7	1.3131	-2.42906	0.00372338
FAM173A	3.83505	-2.42697	0.00374137
DFNA5	3.82815	-2.42218	0.00378285
BCAP31	1.37126	-2.42155	0.00378835
CHMP6	3.82728	-2.42123	0.00379117
MRPL21	3.11235	-2.42089	0.00379409
JUNB	2.1589	-2.42036	0.00379871
STK40	1.40296	-2.41944	0.00380678
NKAIN1	3.82344	-2.41837	0.0038162
GDPD1	1.50987	-2.41804	0.00381906
ATP6V0D1	0.961486	-2.41635	0.00383397
LUZP2	1.21356	-2.41631	0.00383435
NBPF10	3.81832	-2.41505	0.00384549
SMIM4	2.10398	-2.41498	0.00384605
SURF6	3.81603	-2.41458	0.00384968
LIMD2	2.01522	-2.41445	0.0038508
IGFL4	1.31721	-2.41338	0.00386032
KIAA1671	1.42425	-2.41327	0.00386128
CARD8	0.828385	-2.4118	0.0038744
SLC5A8	2.08023	-2.4108	0.00388326
HJURP	1.79448	-2.41007	0.00388984
LY6G5B	0.631403	-2.40806	0.00390791
SLC39A11	2.43996	-2.4077	0.0039111
PSMC3IP	2.71713	-2.40727	0.00391495
ZBED9	1.32547	-2.40706	0.00391688
TRDN	1.16179	-2.4063	0.00392375
PPP1R14B	3.79276	-2.4047	0.00393825
ADAM19	0.560925	-2.40213	0.0039616
DUSP18	1.01649	-2.40067	0.00397495
XRCC3	3.78322	-2.40003	0.00398076
TMEM244	1.28144	-2.39811	0.00399839
KLHL12	0.700685	-2.39724	0.00400646
KIAA1804	1.26241	-2.39702	0.00400848
FAHD1	2.07597	-2.39684	0.00401019
CLDN11	3.77545	-2.39679	0.00401065
GPI	0.912609	-2.39585	0.00401925
SLC17A7	1.69604	-2.39484	0.0040287
NDUFA7	1.04364	-2.39411	0.00403546
CCDC24	3.7687	-2.39309	0.00404494
TMEM132D	2.03278	-2.39302	0.00404559
KRTAP4-11	1.56601	-2.3928	0.00404765
PPCDC	1.36542	-2.39206	0.00405448
CCDC40	1.69031	-2.39187	0.00405627
MLIP	2.52574	-2.39074	0.00406689
MAPK13	1.66029	-2.39054	0.00406871
CCDC166	3.17984	-2.39037	0.00407031
MEX3B	1.25883	-2.38989	0.00407485
TFB2M	1.90252	-2.3888	0.00408508
UHRF1BP1	1.81314	-2.38669	0.00410493
RGMA	0.376703	-2.38597	0.00411175
CCDC51	2.21292	-2.3852	0.00411908
BPIFA2	1.33751	-2.383	0.00414002
CALD1	2.03964	-2.38246	0.00414511
MTRF1L	1.62246	-2.38236	0.00414613
KRTAP9-1	1.08143	-2.38169	0.00415246
C19orf38	0.839494	-2.38119	0.00415731
NSUN4	3.73076	-2.38118	0.00415735
CLDN20	0.943072	-2.38075	0.00416147
LENG1	1.35899	-2.38057	0.00416323
CENPI	0.817494	-2.38015	0.00416722
TTC9B	0.737375	-2.37721	0.00419555
PPM1E	1.08462	-2.37678	0.00419974
ADAT3	2.23656	-2.37639	0.00420354
VPREB1	1.24294	-2.37637	0.00420366
C7orf72	3.71122	-2.37034	0.00426241
GLB1L2	1.77026	-2.36942	0.00427146
SLC25A41	1.82832	-2.36759	0.0042895
TCEAL6	3.70169	-2.36721	0.00429329
TMEM231	2.99375	-2.36679	0.0042974
HLA-DMB	1.1206	-2.36576	0.00430768
KRT35	2.69454	-2.3652	0.00431317
DCAKD	1.42861	-2.36504	0.00431482
GEMIN2	1.55669	-2.36315	0.00433362
GTF3C6	2.9904	-2.36309	0.00433426
RMI2	3.26051	-2.36238	0.0043413
ANAPC15	2.1495	-2.36095	0.00435565
PRELID1	2.18018	-2.36062	0.00435894
RSL1D1	2.83801	-2.35974	0.00436778
TRAF3IP3	1.98029	-2.35921	0.00437309
DNAJB6	1.73396	-2.35772	0.00438811
SCGN	1.0058	-2.35601	0.00440549
BPTF	1.79692	-2.35565	0.00440908
HIST2H3C	2.20657	-2.35553	0.00441036
HIST2H3A	2.20657	-2.35553	0.00441036
SLC5A1	1.17484	-2.35472	0.00441856
COX6B2	3.45226	-2.35465	0.00441926
RAB37	1.45621	-2.35336	0.0044324
DCP2	1.9972	-2.35098	0.00445678
KLHDC8A	3.67234	-2.34952	0.00447179
MB21D1	1.48027	-2.34679	0.00449999
C19orf12	2.07215	-2.34593	0.00450893
TMEM185A	0.898131	-2.34566	0.00451171
TP53INP2	1.19265	-2.34452	0.00452356
SLC17A4	1.02563	-2.34381	0.00453097
CHEK2	0.662182	-2.34018	0.00456895
TYROBP	2.58454	-2.33949	0.00457621
RYBP	2.49739	-2.33713	0.00460116
ATXN7L1	1.82029	-2.33621	0.0046109
SCARF2	1.64732	-2.33458	0.00462827
CYSRT1	2.64561	-2.33416	0.00463271
PDCD7	3.62882	-2.33397	0.00463474
HCN2	1.51269	-2.33203	0.00465551
SUSD2	1.36967	-2.33183	0.00465764
HEXIM2	1.47395	-2.33163	0.00465983
SLC22A7	0.823718	-2.33147	0.00466158
CCDC159	2.44671	-2.3314	0.00466234
PFAS	1.45442	-2.33102	0.00466635
ATP6V1F	3.64079	-2.33091	0.00466755
DPCD	2.76614	-2.33061	0.00467077
NSFL1C	3.64035	-2.33048	0.00467215
NPC1	2.81099	-2.33004	0.00467691
CCT8L2	1.69554	-2.32977	0.00467983
FBN3	0.597798	-2.32906	0.00468745
IGLL1	1.65005	-2.32858	0.00469271
UBXN6	1.90345	-2.32816	0.00469726
PAF1	0.682085	-2.32589	0.00472179
INAFM1	3.62941	-2.32537	0.00472752
AARS2	1.92794	-2.32508	0.00473068
POLR3G	3.62877	-2.32367	0.00474604
TYMS	1.82736	-2.32278	0.00475571
KIF2B	1.14222	-2.32166	0.00476806
TAC4	1.65164	-2.32147	0.00477008
UBALD1	1.09887	-2.32082	0.00477724
TMEM194A	1.08019	-2.32082	0.00477724
EIF2AK4	0.732877	-2.32046	0.00478122
NUP54	3.62268	-2.32028	0.0047832
H3F3B	1.49955	-2.31874	0.00480017
SNAI2	1.99722	-2.31828	0.00480528
SPDYE1	2.05888	-2.31775	0.00481112
SPATA24	2.864	-2.31758	0.004813
TOX2	3.61805	-2.31733	0.00481582
CCNE1	1.38589	-2.31582	0.00483264
SAFB2	2.06934	-2.31484	0.00484352
GNB2L1	1.59958	-2.31449	0.00484743
NSUN2	3.6099	-2.31439	0.00484855
BIN3	1.39607	-2.31086	0.00488812
LZTR1	1.10987	-2.31049	0.00489224
ZNF529	0.839709	-2.31	0.00489777
SLC25A42	1.99208	-2.30907	0.00490827
ACAP2	0.926821	-2.30888	0.00491042
YPEL2	1.74746	-2.30727	0.00492865
TMEM105	2.14296	-2.30475	0.00495732
RPL12	3.5866	-2.30397	0.0049663
MYADML2	1.83155	-2.30346	0.00497214
SERTAD3	2.83948	-2.30341	0.00497266
GTF3C4	2.06546	-2.30324	0.00497459
THG1L	3.58579	-2.30273	0.00498052
C17orf67	1.4393	-2.30043	0.00500693
HIGD1B	1.27916	-2.30036	0.00500775
TFEB	1.51663	-2.29816	0.00503313
MRPL9	0.993358	-2.29633	0.00505442
GPATCH1	3.57438	-2.29613	0.00505669
TNR	2.33109	-2.29405	0.00508095
MUC16	1.87842	-2.29378	0.00508418
CDK5RAP3	1.23075	-2.29368	0.00508535
UPF2	1.75744	-2.29298	0.00509351
PDCD10	1.96057	-2.29259	0.00509817
PTCH2	2.26618	-2.29189	0.0051063
COL10A1	0.742959	-2.29187	0.00510659
SLC16A5	1.17381	-2.2904	0.00512389
DSG4	1.84192	-2.28909	0.00513933
FMNL2	1.0633	-2.28691	0.00516528
FAM110C	2.43273	-2.2851	0.00518678
NKX2-2	1.96494	-2.28456	0.00519332
XKR3	1.46362	-2.28426	0.00519687
C9orf16	2.64346	-2.28329	0.00520851
UROD	3.54664	-2.2827	0.00521552
KRT16	0.676692	-2.28265	0.00521612
VPS33B	0.153099	-2.28227	0.0052207
RASGRP3	1.00172	-2.28141	0.00523109
KREMEN1	1.01367	-2.28009	0.00524693
PHF14	1.96127	-2.27983	0.00525014
YIPF3	2.30809	-2.27858	0.00526531
MTMR8	0.418652	-2.27768	0.00527612
SPNS1	1.10856	-2.27499	0.00530894
NUP210	0.882506	-2.27423	0.00531825
CSAD	1.18725	-2.27381	0.00532338
PRL	0.88814	-2.27347	0.00532753
MGAT5B	1.06174	-2.27327	0.00533007
CGNL1	3.52765	-2.27068	0.00536194
ARPC4-TTLL3	1.50059	-2.26921	0.00538011
SDCBP	0.529666	-2.26866	0.00538696
SDK2	1.05324	-2.26852	0.00538863
NPAP1	3.52546	-2.2679	0.00539638
MCUR1	2.6944	-2.26772	0.00539855
CDCA8	2.87277	-2.26658	0.00541272
SLC39A3	2.2195	-2.26577	0.00542286
SGOL1	2.13679	-2.2648	0.00543504
SYNC	3.51379	-2.26434	0.00544082
ZNF280B	1.10855	-2.26353	0.00545088
ADHFE1	1.39995	-2.26285	0.00545946
PSMB4	0.615758	-2.26194	0.00547097
HIST1H1B	0.887645	-2.26118	0.00548047
COX6A1	1.86593	-2.25981	0.00549779
BAP1	3.50735	-2.25961	0.00550033
C22orf24	2.01108	-2.25832	0.0055167
PTPRG	0.751187	-2.25831	0.00551686
APOBEC3A	2.86788	-2.2559	0.00554753
HSD17B1	1.09717	-2.25571	0.00554995
NRF1	2.37334	-2.25546	0.0055532
ABHD14B	3.15196	-2.25349	0.00557846
CECR2	1.4968	-2.25339	0.00557969
MAPK1IP1L	2.12639	-2.25252	0.00559086
GCGR	1.41054	-2.24855	0.0056422
CACUL1	3.49628	-2.24792	0.00565047
MAF1	3.09045	-2.24688	0.00566401
DHX34	1.02854	-2.24637	0.00567056
ERN1	1.90188	-2.24531	0.00568443
NDUFA9	1.80593	-2.2452	0.00568593
UBE2J1	1.46622	-2.24337	0.00570996
LRRC28	2.15336	-2.24308	0.00571376
UQCRC2	2.20207	-2.2427	0.00571868
PI16	0.467724	-2.24265	0.00571941
ABHD16A	1.29499	-2.2425	0.00572136
MAPK1	1.07654	-2.2423	0.00572404
HDAC2	1.35664	-2.24135	0.0057366
HIST1H4F	0.889195	-2.24094	0.00574196
FAM26E	1.04547	-2.23945	0.00576172
ZNF331	0.712956	-2.23884	0.00576982
PIANP	2.65489	-2.23846	0.00577481
GAMT	1.21913	-2.23846	0.00577482
SIGLECL1	1.69361	-2.23721	0.00579143
BCKDHB	1.13863	-2.23693	0.00579527
ZFR2	2.36271	-2.2364	0.00580231
ZNF329	1.06704	-2.23587	0.00580937
RPL22	-0.143132	-2.23432	0.00583021
ASF1B	1.6726	-2.23424	0.0058312
KPRP	2.06635	-2.23355	0.00584045
NPHP4	3.47441	-2.23296	0.00584851
MIEF1	1.58152	-2.2329	0.00584922
WBSCR16	2.73531	-2.23268	0.00585222
EPOR	1.82372	-2.23221	0.0058586
MSTO1	2.30095	-2.23021	0.0058856
BIRC6	1.41238	-2.22965	0.00589316
TBC1D16	1.08736	-2.22903	0.00590156
NDC80	3.3197	-2.22835	0.0059109
FXYD5	3.13778	-2.22772	0.00591947
RFT1	3.46188	-2.22765	0.00592039
THAP7	2.18494	-2.22631	0.00593864
B3GALTL	-0.213755	-2.22614	0.005941
TMA7	2.39143	-2.22546	0.00595038
UQCRFS1	1.05908	-2.22432	0.00596602
RGS9BP	1.02173	-2.22216	0.00599568
FMO5	3.45034	-2.222	0.00599786
HOOK2	2.00308	-2.22128	0.00600781
FLOT1	1.16999	-2.22115	0.00600962
DAAM2	3.44882	-2.22088	0.00601341
SLC41A1	1.94351	-2.22081	0.00601431
WNT3A	1.94033	-2.22035	0.00602081
HMGN4	2.50832	-2.22021	0.00602265
TEX2	1.21963	-2.219	0.00603944
HIST1H4H	1.05994	-2.21691	0.00606866
ZNF292	1.37842	-2.21643	0.00607529
MAN2B1	1.29889	-2.21551	0.00608816
CCDC105	2.67367	-2.21454	0.00610182
MTMR14	1.85188	-2.21416	0.00610716
SOX7	2.69564	-2.21395	0.0061101
CABLES2	2.57933	-2.21286	0.00612543
NFX1	2.20596	-2.21162	0.00614298
RANBP10	0.781556	-2.21136	0.00614666
DLGAP5	0.734895	-2.21024	0.00616254
CSNK2A2	0.984891	-2.20916	0.00617791
DNM2	2.05427	-2.20899	0.00618037
TRMT2A	2.29077	-2.20744	0.00620244
CCDC9	1.82758	-2.20713	0.00620685
TST	1.79924	-2.20615	0.00622092
AKAP1	1.73503	-2.20435	0.00624676
PPM1F	2.13559	-2.2038	0.00625467
PPY	1.998	-2.20358	0.00625781
PSORS1C2	1.42961	-2.20286	0.00626821
GPN2	2.06353	-2.2025	0.0062733
G6PC	0.976562	-2.20126	0.00629128
LPAR2	1.55424	-2.2007	0.00629943
TRAPPC5	3.41097	-2.20016	0.00630721
COL5A3	0.97161	-2.19941	0.00631808
GMDS	0.970638	-2.19882	0.0063268
SNAP29	2.26535	-2.19865	0.00632915
CREB3L3	3.40934	-2.19834	0.00633377
SCML4	1.21646	-2.1977	0.00634305
DNAH1	3.40658	-2.19761	0.0063444
HIST1H1E	1.86301	-2.19695	0.00635399
CST9L	2.28958	-2.19574	0.00637174
IFT57	3.40187	-2.19434	0.00639237
TNNI2	1.82129	-2.19299	0.00641226
MPND	2.02664	-2.19294	0.00641303
C19orf84	2.341	-2.19192	0.00642807
TBC1D22B	0.663208	-2.19184	0.00642924
EPPIN-WFDC6	1.32873	-2.19115	0.00643941
DNAJA3	3.0774	-2.18963	0.00646201
SDHAF4	1.53621	-2.18893	0.00647246
NFYB	1.54282	-2.18884	0.00647385
B3GNT3	3.38969	-2.18783	0.00648882
PPIL2	0.783725	-2.18744	0.00649478
ADNP	0.90462	-2.18727	0.00649727
HOXB9	0.791206	-2.18714	0.00649925
DNMT1	1.36574	-2.18542	0.00652504
P4HB	3.38507	-2.18496	0.00653191
KRTAP10-2	3.38296	-2.18281	0.00656431
VNN2	0.964574	-2.18277	0.00656488
HDAC1	1.31647	-2.18238	0.00657087
BTG1	2.39256	-2.18169	0.00658127
ABCA8	0.970469	-2.18152	0.00658387
ZKSCAN3	1.00711	-2.18066	0.00659689
MCM9	1.21131	-2.1803	0.00660235
PGLS	2.02316	-2.17994	0.00660792
CXorf38	3.37458	-2.17817	0.00663477
FAM96B	3.37225	-2.17746	0.00664565
TEN1	2.45276	-2.17647	0.00666087
SYNE4	1.94734	-2.17615	0.00666574
CNOT3	1.44584	-2.17596	0.00666871
UBE2S	0.659293	-2.17322	0.00671092
SPRTN	-0.154973	-2.17287	0.00671623
BPIFC	1.59371	-2.17151	0.00673738
CNOT6	1.13827	-2.17059	0.00675167
CD109	0.780157	-2.17026	0.00675677
CD83	1.45728	-2.1702	0.00675779
GOSR2	2.67792	-2.16954	0.00676794
SGSM1	2.1459	-2.16939	0.00677027
FAM161B	3.35292	-2.16898	0.00677677
CCDC74A	1.23284	-2.16823	0.0067885
ULBP2	1.6882	-2.1677	0.00679671
LENG8	3.35046	-2.16757	0.00679874
GINS3	2.23575	-2.16703	0.00680717
DAP	2.63905	-2.16577	0.00682694
GRPEL1	3.34486	-2.16547	0.00683176
GLTPD2	1.75519	-2.16521	0.00683583
YWHAH	1.87416	-2.16437	0.00684897
LSM14A	3.04077	-2.16401	0.00685475
BTBD9	1.68553	-2.16325	0.0068668
ACTR6	3.33971	-2.16232	0.00688143
LDB1	1.04313	-2.16011	0.00691662
POP4	1.80401	-2.15911	0.00693255
CAGE1	1.6722	-2.15861	0.00694041
CDK5RAP2	2.87536	-2.1573	0.0069615
UNC50	2.68399	-2.15718	0.00696339
ZNF211	0.63513	-2.15684	0.00696882
MINOS1	1.96266	-2.15643	0.00697548
RNF8	1.13491	-2.15625	0.00697825
CC2D1A	0.87312	-2.15619	0.0069793
KPNA5	0.417979	-2.15612	0.00698035
GON4L	3.33241	-2.15537	0.00699241
TCTEX1D1	0.674869	-2.15534	0.00699298
EPX	1.34596	-2.15371	0.00701923
DYRK1B	1.41424	-2.1536	0.00702096
DYNLT1	1.37526	-2.15197	0.00704746
AFF1	1.70088	-2.15191	0.00704832
COX6C	3.24601	-2.15182	0.00704983
UFC1	2.73296	-2.15169	0.00705189
METTL12	3.32086	-2.14951	0.00708741
TEAD1	1.91427	-2.14928	0.00709115
CACNG2	1.84615	-2.14891	0.00709725
PIBF1	0.621142	-2.14852	0.00710366
GDF11	2.87496	-2.14744	0.00712132
PRMT5	2.77521	-2.1467	0.00713338
ELP5	2.53389	-2.14515	0.007159
CA10	1.59203	-2.14499	0.00716166
PRR14	2.96881	-2.14471	0.00716614
HIST1H3C	1.10172	-2.14428	0.00717329
RBKS	0.462651	-2.14409	0.00717651
MYCBPAP	1.79091	-2.14362	0.00718415
SPG21	1.50573	-2.14354	0.00718556
MAGEE1	3.31153	-2.14335	0.00718865
VBP1	2.79886	-2.14099	0.00722785
SLC4A11	3.3049	-2.14097	0.0072282
ZNF764	1.25113	-2.14091	0.0072292
ELANE	1.19285	-2.1402	0.00724107
LYRM2	1.93797	-2.13966	0.00725007
MSL1	3.30323	-2.13961	0.00725085
FAM222A	2.1203	-2.13885	0.00726362
EPC1	1.8587	-2.1388	0.00726439
NHSL1	1.91525	-2.13867	0.00726664
PRAMEF16	2.16385	-2.13849	0.00726967
NEU1	1.13166	-2.13813	0.00727569
SHROOM1	1.82142	-2.13793	0.00727904
WFIKKN2	0.760299	-2.13612	0.00730935
FJX1	-0.122365	-2.13519	0.007325
CCNK	1.11005	-2.13498	0.00732863
SLC35D3	1.95997	-2.13458	0.00733537
CCDC47	1.32419	-2.13372	0.00734989
CCDC142	1.26174	-2.13354	0.00735298
GAB4	0.924873	-2.13341	0.00735516
MDM2	0.905033	-2.13244	0.00737158
NUP205	3.28904	-2.13151	0.00738744
GUCA1A	1.03931	-2.13134	0.00739022
NARFL	3.16584	-2.13095	0.00739691
CNTD1	3.28625	-2.13016	0.00741032
PCDH9	3.28583	-2.12949	0.00742177
NFIX	1.06858	-2.12868	0.00743565
CHP2	0.55295	-2.12864	0.00743643
GRIK2	2.06984	-2.12849	0.00743894
MOCS1	2.00403	-2.12834	0.00744142
FCHO2	1.56035	-2.1278	0.0074507
SDHAF2	2.51847	-2.12733	0.00745877
ZNF74	1.09022	-2.12494	0.00749993
ELAVL3	0.793698	-2.12407	0.00751508
MRPS7	1.97089	-2.12387	0.00751847
ID4	1.46015	-2.1236	0.00752309
ATAD5	2.54985	-2.12291	0.00753512
IER2	1.18509	-2.12227	0.0075463
COLGALT1	2.14976	-2.12099	0.00756844
MECOM	1.33171	-2.11968	0.00759132
SIAE	1.72661	-2.11927	0.00759852
DNAJB7	1.16772	-2.11924	0.0075991
TIMM10	2.79809	-2.11909	0.00760162
PIGQ	1.17897	-2.11595	0.00765693
FKBP1A	1.99141	-2.11528	0.00766872
FAM83F	3.25789	-2.11422	0.00768748
PALM	2.90859	-2.11373	0.00769607
PCNXL2	2.01502	-2.11282	0.00771225
PAN2	1.56222	-2.11063	0.00775121
ARPC5	1.71566	-2.11028	0.00775753
LUC7L3	2.15704	-2.10975	0.00776701
CRISPLD1	2.3183	-2.10913	0.00777806
FOXB1	0.638288	-2.1085	0.00778931
MTMR4	0.751903	-2.10812	0.00779618
ZNF653	1.78222	-2.10657	0.00782399
STX18	3.24757	-2.10636	0.00782786
HGS	2.67632	-2.10392	0.0078719
NOVA1	2.69603	-2.10388	0.00787266
SPON2	2.26465	-2.10374	0.00787523
ATG10	-0.276173	-2.10357	0.00787817
TIMM50	3.24334	-2.10343	0.0078808
BEND3	1.70392	-2.0995	0.00795248
THOC7	3.23511	-2.09825	0.00797534
RNF43	0.795987	-2.09755	0.0079882
PAQR4	2.18449	-2.09682	0.00800165
MAP10	3.23294	-2.096	0.00801687
GIPC3	0.723561	-2.09571	0.00802214
ATOX1	1.03402	-2.09527	0.00803034
ATG4A	0.749164	-2.0952	0.00803152
RPS18	1.41888	-2.09452	0.00804407
PVALB	1.22957	-2.09406	0.00805266
NDUFAF3	1.98434	-2.09373	0.00805882
VPS72	3.22563	-2.09182	0.00809426
HAUS3	1.90488	-2.09163	0.00809794
CCDC149	3.21388	-2.09155	0.00809937
PTGES3L	2.54022	-2.09092	0.00811101
ATOH8	1.70194	-2.0905	0.00811886
SPECC1L	2.24257	-2.08994	0.00812936
CIDEC	1.34544	-2.08956	0.00813647
HCRT	1.13438	-2.08868	0.00815308
RAB5C	1.30857	-2.0876	0.00817328
CCZ1B	1.93853	-2.08743	0.00817655
CCZ1	1.85422	-2.08743	0.00817655
VPS4A	0.864674	-2.08741	0.00817685
KRT3	3.21974	-2.08672	0.00818999
NDUFB9	3.2184	-2.08608	0.008202
AGFG1	0.557023	-2.08539	0.00821501
TULP4	1.98299	-2.0852	0.00821868
BRD8	0.703841	-2.08495	0.00822337
SIGLEC10	1.21105	-2.0837	0.00824707
NPM3	0.792154	-2.08274	0.00826524
NDFIP1	1.58591	-2.08196	0.00828014
CCDC93	3.2135	-2.08196	0.00828022
TOM1	0.751008	-2.08154	0.00828813
CTXN1	1.82687	-2.08109	0.00829672
PRPSAP1	1.90626	-2.07839	0.00834851
RCSD1	3.20149	-2.07597	0.00839517
TPD52L1	1.85776	-2.07438	0.00842596
TRIM25	1.03744	-2.07412	0.00843106
PAQR5	2.76314	-2.07383	0.00843668
PKHD1L1	0.548184	-2.07267	0.00845915
SUN3	1.94099	-2.07204	0.00847157
SELO	1.46882	-2.072	0.00847218
ADM5	2.03116	-2.07029	0.00850572
SLC2A11	1.70578	-2.07025	0.00850655
DEF6	0.596293	-2.06979	0.00851555
STAT5B	0.856931	-2.0696	0.00851924
CACYBP	2.63262	-2.06942	0.0085228
SAMD10	3.19308	-2.0694	0.00852308
ZMAT5	3.18983	-2.06754	0.00855979
TCF19	0.48849	-2.06722	0.00856608
SLU7	0.115568	-2.06566	0.00859692
HNRNPUL1	1.03583	-2.06547	0.00860072
PRRG2	2.4318	-2.06366	0.00863649
LURAP1	-0.81793	-2.06287	0.00865219
NKTR	0.904621	-2.0622	0.00866569
MRPL52	1.53571	-2.06096	0.00869031
MYH9	1.31366	-2.06014	0.00870683
ZNF699	1.01078	-2.05965	0.00871658
HDDC3	3.17532	-2.05919	0.00872591
GNB1L	1.11946	-2.05886	0.00873262
CRBN	0.743406	-2.05809	0.00874794
C6orf120	1.97128	-2.05736	0.00876273
CSNK2B	2.3912	-2.0568	0.00877399
NFE2L1	1.05515	-2.05654	0.00877939
TEKT4	3.11672	-2.05589	0.0087924
GPR32	0.606433	-2.05585	0.00879325
RBM42	1.62514	-2.05535	0.00880337
KCTD1	0.829767	-2.05498	0.00881093
ARIH2	0.231721	-2.05463	0.00881799
SLC13A3	1.67352	-2.05342	0.00884256
GSE1	3.16563	-2.05337	0.00884371
ZNF77	0.715181	-2.05218	0.00886793
TOR2A	1.79148	-2.05192	0.00887326
FZD5	3.16403	-2.05123	0.00888729
PDCD2L	3.16239	-2.05001	0.00891224
PDAP1	1.94879	-2.04993	0.00891395
ZC2HC1A	2.43029	-2.04964	0.00891989
SMR3A	1.32769	-2.04939	0.00892513
MYO9B	2.54107	-2.04925	0.00892783
EEF2KMT	3.15652	-2.04789	0.00895598
FAXDC2	1.64807	-2.04683	0.0089779
FASTKD5	0.717909	-2.04572	0.00900078
TANGO2	1.69697	-2.04522	0.00901108
RASSF8	3.15012	-2.04456	0.00902492
CGB5	1.42057	-2.04454	0.00902516
CGB8	1.42057	-2.04454	0.00902516
ADRM1	2.49339	-2.04388	0.00903902
L3MBTL3	2.71507	-2.04319	0.00905334
HOXB4	0.794997	-2.04318	0.0090536
DOPEY1	0.682819	-2.04275	0.00906264
NT5DC1	1.76044	-2.04225	0.00907297
FOXA3	1.07003	-2.04163	0.00908592
DVL2	1.66681	-2.0415	0.00908876
PCDH8	2.24991	-2.04123	0.00909428
NDUFB2	3.14429	-2.04094	0.0091004
WASF3	1.18435	-2.0386	0.00914953
ZNF880	1.35641	-2.03744	0.00917405
SLX4IP	1.63286	-2.03706	0.00918214
VPS37A	1.76865	-2.036	0.00920439
CCDC175	2.10958	-2.03582	0.00920824
TRMT1	2.24145	-2.03569	0.00921107
SLC25A29	3.13133	-2.03524	0.00922052
RAB40B	2.37848	-2.03516	0.0092224
RAC2	0.75544	-2.0344	0.00923843
GH2	0.918261	-2.03432	0.00924018
MBD3L5	2.21835	-2.03356	0.00925632
MBD3L4	2.21835	-2.03356	0.00925632
MBD3L3	2.21835	-2.03356	0.00925632
ZNF524	1.36941	-2.03305	0.00926733
COG6	3.12116	-2.03107	0.0093095
C6orf47	0.649626	-2.03081	0.00931526
EHD2	1.60862	-2.0307	0.00931743
GIPC2	1.40086	-2.03053	0.00932108
EVC	3.11727	-2.02929	0.00934775
PPDPF	1.50174	-2.02919	0.00934996
HIST1H2AJ	2.29176	-2.02903	0.00935334
NDUFV1	1.2837	-2.02824	0.0093705
SENP3	0.642783	-2.02818	0.00937172
TXNRD2	1.5469	-2.02787	0.00937836
PPM1A	1.30462	-2.0264	0.00941027
WHAMM	1.63768	-2.02638	0.00941063
MTRNR2L5	1.15849	-2.02568	0.00942573
SNX21	1.32085	-2.02541	0.0094316
IRF4	0.792791	-2.0248	0.00944495
KIF3B	1.36244	-2.02413	0.00945965
MAFG	1.5854	-2.02408	0.00946068
ELL	3.10658	-2.0225	0.00949507
TSR3	3.10497	-2.02221	0.0095015
ASPSCR1	1.96464	-2.02162	0.00951431
CREB1	0.411673	-2.02155	0.00951594
RIPPLY2	3.1026	-2.02133	0.00952081
ZNF561	0.816366	-2.02124	0.00952266
HEATR1	0.721016	-2.02106	0.0095267
FAM76A	3.10225	-2.02074	0.00953368
COG1	1.67392	-2.02062	0.0095362
NCOA5	2.25703	-2.01965	0.00955771
ATG9A	2.4036	-2.01925	0.00956641
FRYL	1.19224	-2.01922	0.00956711
CFL1	3.10021	-2.01898	0.00957236
CES2	0.972593	-2.01823	0.00958889
TIRAP	1.79193	-2.01812	0.00959143
SPRY3	2.06702	-2.01741	0.00960706
SPATA20	1.69849	-2.01728	0.00960997
DMRTC1	1.73856	-2.01616	0.00963477
DMRTC1B	1.73856	-2.01616	0.00963477
TRNT1	1.7441	-2.01596	0.00963907
CDC40	0.917529	-2.01591	0.0096402
EXOC2	1.08946	-2.01536	0.00965242
EPN3	1.98541	-2.01512	0.00965786
CAV2	0.538288	-2.01314	0.00970188
CCDC140	1.46382	-2.01274	0.0097109
EXD1	3.09113	-2.01257	0.00971482
FAM153B	1.00586	-2.01233	0.00972019
FAM153A	0.930174	-2.01233	0.00972019
SLC25A51	1.72532	-2.01083	0.00975369
PPP1R3G	3.08548	-2.01082	0.00975384
MYB	0.906098	-2.01078	0.00975478
ZNF823	0.968786	-2.01072	0.00975615
KIR2DL3	0.496057	-2.01054	0.00976026
ZNF598	1.02598	-2.01036	0.00976438
CCS	3.0848	-2.01024	0.00976686
SLC30A2	3.0845	-2.00996	0.00977338
NCR1	0.674915	-2.00981	0.00977673
PAPL	0.704759	-2.00956	0.00978222
RUFY1	1.68276	-2.00942	0.00978542
ZMYM5	1.59578	-2.00877	0.00980009
CIITA	0.889918	-2.00828	0.0098111
APOPT1	0.0141514	-2.00823	0.00981232
CALCOCO2	1.56698	-2.00731	0.00983315
URM1	1.70582	-2.00579	0.00986754
MRPL38	1.63508	-2.00577	0.00986798
MRPL36	1.93526	-2.00528	0.00987908
ZNF132	1.58036	-2.00481	0.00988983
TRIM47	2.6222	-2.00421	0.00990355
NPIPA1	1.86444	-2.00395	0.00990942
TNFRSF18	0.661881	-2.00384	0.00991202
MRPS35	2.23035	-2.00278	0.00993612
LONP1	1.97498	-2.00265	0.00993909
IL25	2.10848	-2.00226	0.009948
SFR1	1.30958	-2.00201	0.00995374
DPPA5	1.69901	-2.00165	0.00996206
TAF12	1.12642	-2.00116	0.00997342
GCHFR	0.327995	-2.00096	0.00997797
CBY1	2.69157	-2	0.00999994
HIST1H2AC	1.38612	-1.99922	0.010018
DLX4	0.598383	-1.99825	0.0100404
DHX30	1.3472	-1.99811	0.0100436
GPR108	2.16624	-1.99807	0.0100446
EED	3.06661	-1.9976	0.0100554
B3GALT4	2.02466	-1.99683	0.0100733
DDX49	3.06512	-1.99646	0.0100818
ASUN	0.995764	-1.99618	0.0100884
BSG	0.947655	-1.99605	0.0100913
LPO	1.42685	-1.99564	0.0101008
SLC24A3	1.37186	-1.99564	0.0101008
GTSE1	1.66086	-1.99556	0.0101027
FAM117A	1.21085	-1.9954	0.0101065
SYCP2L	1.07197	-1.99498	0.0101164
GABARAPL2	0.696702	-1.99334	0.0101545
FANCA	2.29302	-1.99258	0.0101724
NLRX1	1.71609	-1.99245	0.0101754
GFAP	2.45687	-1.99193	0.0101875
TRIM38	0.658674	-1.9905	0.0102212
FMNL3	1.82628	-1.98971	0.0102397
TICAM1	1.59142	-1.98962	0.0102418
ANHX	1.2942	-1.98899	0.0102568
GLB1L3	1.0465	-1.98868	0.0102641
RASL10A	1.19573	-1.98843	0.0102699
ALDH5A1	1.40087	-1.9882	0.0102754
ZNF865	0.848109	-1.98802	0.0102797
OLFM1	2.20108	-1.98736	0.0102954
ZNF14	0.455699	-1.9873	0.0102968
RIMS1	0.743762	-1.98718	0.0102997
CEACAM19	0.711836	-1.98678	0.0103092
HIST1H1C	1.0165	-1.98647	0.0103164
ZNF44	0.58023	-1.98645	0.0103169
ZNF205	2.07964	-1.9859	0.01033
CDC25A	2.27766	-1.98561	0.010337
EEF2	1.83373	-1.98527	0.010345
GSC2	1.90111	-1.98525	0.0103455
PPM1D	3.04609	-1.98515	0.0103479
UFM1	1.13843	-1.98476	0.0103572
TRAPPC6A	1.16604	-1.9835	0.0103873
ELFN2	0.969608	-1.98344	0.0103887
KDM5C	0.564304	-1.98326	0.0103931
R3HDM1	2.27831	-1.98215	0.0104196
ARHGEF35	0.970572	-1.98215	0.0104196
ARRB2	1.35645	-1.98207	0.0104215
TRIM69	1.15248	-1.98157	0.0104335
XPNPEP3	2.09664	-1.98131	0.0104397
UAP1L1	3.03786	-1.98067	0.0104552
SEC11A	1.63314	-1.97971	0.0104783
DDR2	1.20044	-1.97892	0.0104973
RPL38	1.92077	-1.97877	0.010501
JUP	0.78185	-1.97856	0.010506
APPBP2	1.03714	-1.9779	0.010522
PDCD2	1.10653	-1.97757	0.01053
AVL9	3.03327	-1.97705	0.0105428
ATCAY	1.15631	-1.97622	0.0105629
SMARCA4	0.943021	-1.97592	0.0105702
ZNF280A	0.995446	-1.97589	0.0105708
PRRC1	3.03094	-1.97566	0.0105765
AARD	1.26295	-1.97524	0.0105866
ACSM3	0.804862	-1.97484	0.0105965
KCNJ16	1.09676	-1.97388	0.01062
PQLC3	3.02644	-1.97316	0.0106374
CAPN11	1.02514	-1.97314	0.010638
KLHL32	0.747878	-1.97274	0.0106479
PPP2R5C	1.91952	-1.97257	0.0106519
PIH1D1	1.99703	-1.97218	0.0106616
MUC21	0.324769	-1.97178	0.0106714
HDDC2	1.4519	-1.97168	0.0106738
SARS	3.02377	-1.97095	0.0106917
USP17L21	1.73661	-1.97094	0.010692
IFI35	2.8733	-1.97092	0.0106926
CTDP1	0.103489	-1.9708	0.0106955
ADGRF4	2.96763	-1.96902	0.0107393
FAF2	1.02858	-1.96878	0.0107452
CDKAL1	1.47033	-1.96764	0.0107735
CYCS	2.46386	-1.96726	0.010783
SAMM50	3.01572	-1.96655	0.0108007
AMER1	1.87317	-1.96634	0.0108059
PPP1R3A	3.01568	-1.966	0.0108143
HDGF	2.11925	-1.96575	0.0108205
COX4I1	2.05615	-1.96563	0.0108237
CPNE5	1.03209	-1.96523	0.0108336
TAZ	2.07974	-1.96475	0.0108456
UBLCP1	0.389277	-1.96323	0.0108836
POLDIP3	0.915851	-1.96311	0.0108866
ZNF606	1.81992	-1.96274	0.0108958
MZF1	0.854239	-1.96221	0.0109091
TBCB	0.840775	-1.96193	0.0109162
CARM1	1.95413	-1.96173	0.0109211
SPHK2	3.00682	-1.96135	0.0109307
PCMT1	3.00496	-1.96053	0.0109513
COG8	3.00453	-1.95972	0.0109719
PSMG4	3.00406	-1.95945	0.0109788
SEC14L6	1.06005	-1.95896	0.0109911
GDF15	1.22675	-1.9584	0.0110053
TOM1L1	1.59408	-1.95832	0.0110074
SH3BP1	1.4698	-1.9578	0.0110205
RPL18A	2.38754	-1.95756	0.0110265
GMFG	0.608964	-1.9572	0.0110356
HIST1H1T	1.32359	-1.9572	0.0110358
TRRAP	1.72855	-1.95661	0.0110506
TYRP1	0.942062	-1.95539	0.0110817
DCDC2B	2.29685	-1.95512	0.0110887
YBX1	1.94939	-1.95441	0.0111069
TCEB3B	2.99511	-1.95429	0.0111098
C1QTNF2	1.03381	-1.95405	0.011116
CBX4	1.29931	-1.95359	0.0111277
FAM83H	2.99248	-1.95294	0.0111444
UBD	0.681787	-1.95233	0.0111602
WISP3	2.50737	-1.95226	0.011162
CACNA1I	1.27013	-1.95176	0.0111749
CNN2	1.59388	-1.95151	0.0111811
BBS9	2.44331	-1.95052	0.0112067
TMEM200C	1.11776	-1.94984	0.0112242
ARRDC2	1.38681	-1.94897	0.0112469
TUBGCP3	2.48204	-1.94896	0.0112472
FAM187B	1.20971	-1.94853	0.0112582
ATG4D	1.70861	-1.94809	0.0112696
SYDE1	1.47262	-1.94723	0.0112921
TMEM62	0.354405	-1.94683	0.0113023
ICE1	1.66658	-1.94508	0.011348
NUF2	2.97758	-1.94489	0.011353
RPL13	0.44413	-1.94472	0.0113575
CAMSAP2	0.853471	-1.94433	0.0113678
NDUFB7	1.88815	-1.94107	0.0114532
PCMTD1	2.97092	-1.94089	0.011458
SPAM1	1.20834	-1.94078	0.011461
PRR16	0.773289	-1.94042	0.0114704
MTHFS	2.08913	-1.94036	0.0114719
DACT2	1.92047	-1.93978	0.0114872
MSLN	0.983926	-1.9393	0.0115
CLDN15	2.02736	-1.93929	0.0115002
PRSS16	1.22638	-1.93928	0.0115007
PEX3	1.87454	-1.93856	0.0115198
AP1S1	1.39341	-1.93729	0.0115533
CINP	1.08353	-1.93706	0.0115595
ATP2B3	1.57743	-1.93694	0.0115627
SARNP	0.217197	-1.93636	0.0115781
ATRX	1.29106	-1.93611	0.0115847
TRMT11	1.89811	-1.93548	0.0116016
HIC2	2.96134	-1.93506	0.0116128
KCND2	0.693604	-1.9347	0.0116225
TUBA8	1.69229	-1.93469	0.0116227
EDAR	0.907326	-1.9343	0.0116332
TMEM221	2.95971	-1.93401	0.0116411
DKKL1	2.03903	-1.93378	0.0116472
ZNF254	0.866304	-1.93358	0.0116525
PKLR	0.686526	-1.93346	0.0116556
KLHL10	1.11187	-1.93235	0.0116857
RPL27A	1.0046	-1.93225	0.0116883
NSDHL	0.651407	-1.93082	0.0117269
C17orf80	1.34468	-1.93064	0.0117317
PRDX2	1.82137	-1.93044	0.0117372
KLHL31	0.295911	-1.93029	0.0117412
PRX	1.57757	-1.93012	0.0117457
NXPH4	2.94963	-1.92954	0.0117615
ECH1	0.912834	-1.92871	0.0117841
RBM34	2.94597	-1.92771	0.0118112
PNMAL1	1.58419	-1.92756	0.011815
SMARCD1	1.5777	-1.9267	0.0118385
HBZ	0.884224	-1.92635	0.0118481
KLK8	1.49432	-1.92623	0.0118513
MYLIP	0.959039	-1.9258	0.0118632
HIST1H4I	0.571191	-1.92535	0.0118754
SOCS3	1.13411	-1.92529	0.011877
ZDHHC23	2.02235	-1.92526	0.011878
UXT	2.941	-1.92457	0.0118967
SLC16A3	1.81011	-1.92345	0.0119276
MB21D2	2.93969	-1.92327	0.0119324
OTOP2	2.93968	-1.92301	0.0119396
C7orf50	2.9393	-1.92223	0.011961
DENND6B	1.3244	-1.92172	0.0119752
ZPLD1	0.862136	-1.92094	0.0119966
TMEM249	1.77321	-1.92078	0.0120009
RUNDC3A	2.93704	-1.92041	0.0120112
LGALS4	0.976778	-1.92031	0.012014
ZNF28	0.451681	-1.92026	0.0120156
PROK2	2.93687	-1.92016	0.0120183
TADA2B	0.611145	-1.92014	0.0120188
TXNIP	0.710606	-1.92013	0.0120191
IFNL3	0.677006	-1.92002	0.0120221
ST6GALNAC2	1.16197	-1.91967	0.0120318
GPR25	1.31741	-1.91932	0.0120415
CST3	1.30615	-1.91897	0.0120512
GTF2B	2.93463	-1.91886	0.0120542
EEF1B2	2.64544	-1.91873	0.012058
BCL7A	2.51949	-1.91776	0.0120848
NFYC	1.59661	-1.91752	0.0120915
C1QTNF6	1.24756	-1.91727	0.0120985
PRDM13	2.93229	-1.91679	0.0121117
TMEM53	2.93202	-1.91654	0.0121189
CDC34	1.75321	-1.91626	0.0121268
TXNL4A	1.87171	-1.91616	0.0121293
ADAD1	2.93098	-1.91602	0.0121333
C21orf33	-0.211154	-1.91419	0.0121844
WFS1	2.92879	-1.91396	0.012191
CHRDL2	2.92679	-1.91293	0.0122199
KCNH6	1.04645	-1.91158	0.0122579
CPSF4L	1.68449	-1.91065	0.0122843
UTP11L	1.85379	-1.91028	0.0122947
EDC3	2.91726	-1.91011	0.0122995
H1F0	2.19896	-1.90964	0.0123129
ARHGEF33	2.55379	-1.90876	0.0123379
TBC1D5	1.04601	-1.90835	0.0123496
RHBDL2	-0.97737	-1.90834	0.0123498
MAD2L1BP	1.81177	-1.90816	0.0123549
ABCC6	1.88622	-1.90788	0.0123628
TNRC18	1.69042	-1.90685	0.0123923
PRKRIR	0.487146	-1.90655	0.0124009
MYO1E	0.757793	-1.90625	0.0124093
FSIP2	0.764636	-1.90498	0.0124458
NOB1	0.204165	-1.90448	0.01246
TTC21A	0.811636	-1.90393	0.0124759
TREM2	0.923278	-1.90364	0.0124842
HMOX2	1.65682	-1.90351	0.0124879
NAA25	1.97048	-1.9029	0.0125054
FUK	0.785943	-1.90288	0.0125059
KLHL35	1.02219	-1.90257	0.0125151
LRRC73	1.78755	-1.90196	0.0125324
WDR75	2.90317	-1.90171	0.0125397
RABEPK	1.5057	-1.90166	0.0125411
UQCRH	2.82407	-1.90066	0.0125702
MRPL32	2.90094	-1.90019	0.0125836
ZNF726	0.996983	-1.89969	0.0125981
ZNF445	0.688579	-1.89917	0.0126133
ATXN2L	0.572933	-1.89876	0.0126253
LGSN	0.990734	-1.89788	0.0126507
SWI5	1.73167	-1.89742	0.0126642
ZNF382	0.471091	-1.89639	0.0126943
IGF2R	1.83793	-1.8958	0.0127116
TMEM203	1.38746	-1.89542	0.0127227
TNIP3	0.882973	-1.89541	0.0127231
PRAMEF12	1.72615	-1.89511	0.0127317
NSMF	0.934224	-1.89499	0.0127354
CASP14	1.20322	-1.89437	0.0127536
FAM189B	1.85078	-1.89368	0.0127739
CCDC6	1.23012	-1.8935	0.0127791
SLC25A28	2.17913	-1.89344	0.0127809
ADGRA1	2.89217	-1.8934	0.0127821
ADD3	1.82612	-1.89311	0.0127904
TMEM261	1.75557	-1.89309	0.0127913
TMED4	2.88956	-1.8924	0.0128116
HIST1H4G	0.705024	-1.89223	0.0128166
CNST	2.01593	-1.89158	0.0128357
PPFIBP2	2.8885	-1.8914	0.0128412
GLYR1	1.35876	-1.8913	0.0128439
NOTUM	1.48344	-1.89058	0.0128652
SAMD14	2.88552	-1.89015	0.0128781
TSKS	1.76784	-1.88979	0.0128888
RSAD1	2.11106	-1.88798	0.0129426
SPTBN2	2.88084	-1.8879	0.0129448
PBX2	0.939409	-1.88761	0.0129536
ZNF548	0.531936	-1.88715	0.0129673
CD164	1.55513	-1.88638	0.0129902
WASF1	2.87742	-1.88591	0.0130043
PPP1R1A	2.14388	-1.8858	0.0130078
CCDC136	2.79621	-1.88569	0.0130109
UBIAD1	1.55379	-1.88533	0.0130218
DGCR8	1.27409	-1.88477	0.0130387
TMEM43	0.434069	-1.8841	0.0130588
MYPOP	0.811936	-1.88358	0.0130744
CHTOP	1.66857	-1.88299	0.0130922
UQCC1	2.3687	-1.88252	0.0131063
LPPR2	1.97766	-1.88194	0.0131239
FBXW11	2.35087	-1.88147	0.013138
ABCB8	1.09847	-1.88001	0.0131822
LGALS2	1.47103	-1.87989	0.0131861
ZNF30	0.75809	-1.87978	0.0131891
SLC37A3	1.11926	-1.87887	0.0132171
ZNF440	1.0535	-1.87766	0.0132538
FN3K	0.759564	-1.87657	0.0132871
LAMTOR1	2.86199	-1.87506	0.0133333
RIMBP3C	2.53052	-1.87484	0.0133402
RIMBP3B	2.53052	-1.87484	0.0133402
SFXN4	1.73815	-1.8748	0.0133413
ZMAT2	2.86141	-1.87457	0.0133483
ENO3	2.86015	-1.87359	0.0133785
TIMM13	1.36071	-1.87353	0.0133804
NEMF	1.57235	-1.87301	0.0133963
DBNDD1	1.50516	-1.87275	0.0134045
CREBRF	2.10447	-1.87263	0.0134081
EBI3	1.54698	-1.87205	0.013426
ZFP36	2.05013	-1.87182	0.0134331
ZNF222	0.853093	-1.8717	0.013437
SMIM17	1.76374	-1.87038	0.0134777
COX18	1.54419	-1.8702	0.0134833
HEATR5B	0.803462	-1.86998	0.0134902
FURIN	1.62461	-1.86946	0.0135064
ASF1A	1.41707	-1.86827	0.0135435
RPS13	0.588837	-1.86769	0.0135615
STK35	0.898891	-1.86741	0.0135703
MYADM	1.91522	-1.86697	0.013584
PAPPA2	1.33894	-1.86587	0.0136185
TEX14	1.35317	-1.86549	0.0136305
SLC44A4	1.78363	-1.86547	0.0136309
TMEM158	1.53412	-1.86536	0.0136345
JMJD6	1.62286	-1.86524	0.0136381
WDR81	1.06429	-1.86518	0.01364
DAGLB	1.77721	-1.86501	0.0136454
ZBED2	2.84472	-1.86484	0.0136509
TCP10	2.84385	-1.86436	0.0136661
MED28	2.07466	-1.86433	0.0136669
SLC25A46	2.29945	-1.86375	0.0136852
RPL22L1	0.882176	-1.86353	0.0136921
SPATA32	0.947368	-1.86277	0.0137159
GGTLC1	1.76197	-1.86244	0.0137266
AMPD2	1.10344	-1.86154	0.0137551
HIPK1	1.45522	-1.8608	0.0137786
ACAD11	1.90822	-1.8607	0.0137817
IL17B	1.56899	-1.86065	0.0137832
NOL7	1.12037	-1.86057	0.0137858
NCOA7	2.21382	-1.85939	0.0138232
HSBP1	0.882983	-1.85932	0.0138256
GOLGA6A	2.76371	-1.85897	0.0138367
GOLGA6D	2.76371	-1.85897	0.0138367
HIST1H4D	1.54361	-1.85859	0.0138487
GRIN2D	0.741663	-1.85789	0.013871
ZMYND10	1.99294	-1.85759	0.0138807
ARHGAP27	1.25943	-1.85691	0.0139023
MED17	0.800499	-1.85669	0.0139095
RPL34	2.83102	-1.85666	0.0139105
P3H4	0.633223	-1.85636	0.0139201
RAI1	-1.67261	-1.85553	0.0139468
ITGB4	1.50453	-1.85541	0.0139504
IL4R	0.45951	-1.85414	0.0139913
RSPH9	1.01837	-1.85399	0.0139961
MRPL12	2.82791	-1.85379	0.0140027
OSBPL10	2.82546	-1.85307	0.0140258
SLC39A2	1.71284	-1.85277	0.0140355
DCXR	1.27509	-1.85227	0.0140517
BCAS2	1.01693	-1.85211	0.0140568
MED12L	1.60706	-1.8519	0.0140638
STXBP2	2.2658	-1.85163	0.0140724
COPZ1	1.6799	-1.85061	0.0141055
HEBP2	1.8032	-1.85048	0.0141098
MRPS26	1.58707	-1.84949	0.0141419
TCF21	1.5657	-1.84936	0.0141463
SUPT16H	0.785659	-1.84873	0.0141669
ZACN	1.2252	-1.84869	0.0141682
RASGEF1C	0.812025	-1.84772	0.0141998
UNC93A	1.8728	-1.84704	0.0142219
PRC1	2.81538	-1.84666	0.0142343
C4A	0.628454	-1.84644	0.0142418
SPRYD3	0.919969	-1.84627	0.0142473
NDUFAF7	2.0538	-1.84615	0.0142511
DUS4L	0.699991	-1.84604	0.0142548
KRTAP4-5	2.45255	-1.84585	0.014261
ARSG	2.64025	-1.84547	0.0142733
LAX1	1.17605	-1.84536	0.0142769
TBXAS1	1.06802	-1.8453	0.0142789
MFSD11	2.2764	-1.84528	0.0142796
KRT85	0.915436	-1.84485	0.0142938
ZBTB1	0.491	-1.84463	0.0143012
ST20	1.68734	-1.84427	0.0143131
RPL32	0.24165	-1.84369	0.014332
LSM2	1.41995	-1.84347	0.0143392
SAT2	1.95033	-1.84293	0.0143572
ENTPD8	2.81081	-1.84289	0.0143585
TLE6	1.66227	-1.84288	0.014359
SPEN	2.42066	-1.8428	0.0143615
ZNF106	1.60154	-1.84273	0.0143638
IL1RL2	0.316603	-1.84271	0.0143646
NUP133	1.26529	-1.84237	0.0143758
SAP18	1.24522	-1.84203	0.014387
CAB39	0.461017	-1.84175	0.0143964
IRX1	0.717294	-1.84152	0.0144039
SMG5	1.50331	-1.84145	0.0144063
NME1	1.44969	-1.84101	0.0144207
NUTM1	2.80792	-1.84031	0.0144442
TMEM141	2.80768	-1.83984	0.0144598
KCNH4	0.927774	-1.83947	0.0144722
HIST1H3I	1.69867	-1.83908	0.014485
UFL1	2.15852	-1.83872	0.014497
HECA	2.80548	-1.83867	0.0144989
RAB7A	1.32393	-1.83813	0.0145167
CKM	1.01542	-1.83732	0.0145439
TMEM176B	2.40427	-1.83728	0.0145451
MRPL18	2.33549	-1.83724	0.0145464
STH	1.91824	-1.83717	0.0145489
LETM1	0.656033	-1.836	0.0145883
CTNNA2	2.80165	-1.83493	0.0146242
TMED1	2.00838	-1.83473	0.0146309
HSD3B2	2.80116	-1.8347	0.014632
ZNF701	0.24375	-1.83459	0.0146356
BMP3	1.04804	-1.83381	0.014662
RAMP2	1.28477	-1.83375	0.0146641
CABIN1	1.72455	-1.83359	0.0146695
NHLRC1	1.32214	-1.83296	0.0146907
TMEM178B	1.5878	-1.83291	0.0146922
S100P	2.79808	-1.8326	0.0147027
PM20D2	1.0263	-1.83218	0.014717
ATP6V0A4	1.0173	-1.83183	0.0147288
THEMIS	1.84401	-1.8317	0.0147332
TBCA	1.47113	-1.83157	0.0147376
TULP1	1.04032	-1.83148	0.0147407
PPP2R5D	1.12272	-1.83111	0.0147533
SEC14L5	2.66961	-1.83105	0.0147555
PLA2G3	1.47377	-1.83065	0.0147688
KIAA1551	1.74325	-1.8306	0.0147708
GRIPAP1	2.73062	-1.83056	0.014772
DCTN6	1.37297	-1.82891	0.0148281
KRTAP3-1	1.29571	-1.82734	0.014882
RGS14	2.74492	-1.82734	0.0148821
PODNL1	1.33251	-1.82699	0.014894
ADAMTSL4	2.7895	-1.82682	0.0149
CDV3	0.79146	-1.82574	0.014937
ICT1	1.57142	-1.82545	0.014947
POLR2J2	2.78595	-1.82474	0.0149712
POLR2J	2.78595	-1.82474	0.0149712
MYOD1	-0.325773	-1.82414	0.014992
LMCD1	2.78492	-1.82359	0.0150109
FAM209B	1.89227	-1.82345	0.0150159
LRRC59	0.968959	-1.82264	0.015044
HOXB7	1.14278	-1.82258	0.0150459
SRXN1	2.31994	-1.82256	0.0150466
CSH1	1.02851	-1.82141	0.0150865
VEZF1	0.432817	-1.82113	0.0150964
ATP5D	0.702829	-1.82102	0.0151002
ARMC2	0.827665	-1.8209	0.0151041
VPS52	1.95345	-1.81957	0.0151505
MBD3L1	0.864028	-1.81929	0.0151604
B9D2	1.65202	-1.81924	0.015162
OPALIN	1.52769	-1.81923	0.0151626
MKL1	2.77834	-1.81855	0.0151861
SNAPC4	2.77684	-1.81764	0.015218
TMOD3	0.842167	-1.81711	0.0152368
LRP10	2.00592	-1.81703	0.0152393
FILIP1	1.86879	-1.8168	0.0152474
TUBB2B	0.592559	-1.81638	0.0152623
GIMAP8	0.766437	-1.81625	0.0152669
DMRT2	0.844049	-1.8151	0.0153074
TMC2	1.44603	-1.81476	0.0153193
MED4	2.48532	-1.8145	0.0153285
NSG1	2.7704	-1.81423	0.0153381
KRTCAP2	2.77018	-1.81378	0.0153541
MON1B	1.57222	-1.81351	0.0153634
TRIP6	2.04782	-1.81313	0.0153768
FAM53B	0.839362	-1.81272	0.0153915
RSPO4	1.44824	-1.81248	0.0154
NDUFB10	1.90741	-1.81197	0.0154179
SACM1L	1.64336	-1.81158	0.0154318
SLC12A4	0.476215	-1.81136	0.0154396
GPC5	2.76477	-1.81128	0.0154425
APLP1	2.76444	-1.81106	0.0154505
KCNK6	0.707129	-1.81081	0.0154594
MRGBP	2.64868	-1.81076	0.0154613
GPR52	0.72977	-1.8107	0.0154633
ADD1	0.799848	-1.80981	0.0154949
TAMM41	1.09719	-1.80974	0.0154975
ZNF354A	0.84854	-1.80953	0.015505
ADRBK2	1.08062	-1.80858	0.0155388
SEC22A	0.696904	-1.8085	0.0155417
ZNF844	1.16658	-1.80808	0.0155567
LTA	0.455614	-1.80758	0.0155746
UBA2	1.06043	-1.80747	0.0155786
GEMIN8	-0.363181	-1.80697	0.0155967
PBX4	1.81167	-1.8064	0.0156172
SCAF1	2.01123	-1.80553	0.0156485
ASXL3	2.08935	-1.80552	0.0156489
PARK2	2.67523	-1.80544	0.0156517
TNNI3K	0.904919	-1.80497	0.0156685
FAM63B	1.82301	-1.80442	0.0156883
C1orf186	1.53438	-1.80432	0.0156922
NDUFAF1	0.773226	-1.8043	0.0156929
RETNLB	1.29346	-1.80401	0.0157034
RPL35	1.06821	-1.80379	0.0157113
NOLC1	1.42552	-1.80355	0.0157198
P2RX6	1.3305	-1.80331	0.0157286
PNMA1	2.23206	-1.80307	0.0157375
HN1	1.46999	-1.80299	0.0157401
MC1R	2.20501	-1.80198	0.0157768
CDK2	1.5101	-1.80148	0.015795
HACE1	0.718018	-1.79938	0.0158715
METTL2A	2.74094	-1.79872	0.0158958
ATP4A	0.816149	-1.79871	0.0158961
STAMBP	0.450608	-1.79788	0.0159264
RBMX	0.650296	-1.79788	0.0159265
GAGE12H	2.73888	-1.7976	0.0159366
PAWR	0.464106	-1.79749	0.0159407
SQLE	0.807306	-1.79738	0.0159447
KIAA0391	2.73856	-1.79738	0.0159448
GLCE	1.54151	-1.79736	0.0159456
SFTA2	2.47775	-1.79716	0.0159528
EID1	1.99769	-1.79682	0.0159655
HMGA1	0.738508	-1.79666	0.0159711
EEF1D	2.73608	-1.79649	0.0159774
ZNF546	0.77931	-1.79639	0.0159813
INSIG1	0.678517	-1.79633	0.0159833
SIRT7	1.3201	-1.79577	0.0160039
NIPAL4	1.29304	-1.79495	0.0160343
[truncated: 15,987 more rows]
